# Supplementary material for: Diagnostic accuracy of delirium diagnosis in pediatric intensive care: a systematic review
Source: Springer Nature journal article supplement (doi:10.1186/s13054-014-0489-x), 2014-09-25
Supplement: MOESM1 [file 9779586]

**DIAGNOSTIC ACCURACY OF DELIRIUM DIAGNOSIS IN PEDIATRIC INTENSIVE  
CARE: A SYSTEMATIC REVIEW**

**ESM\_1\_Joffe:**

**The search strategy used in the systematic review.**

---

**Authors:** Alia Daoud BSc<sup>1</sup>, Jonathan P Duff MD<sup>1,2</sup>, Ari R Joffe MD<sup>1,2</sup>

**Affiliations:** 1. University of Alberta, Faculty of Medicine and Dentistry; 2. University of Alberta, Department of Pediatrics and Stollery Children's Hospital.

**Corresponding Author:** Ari R Joffe MD; 4-546 Edmonton Clinic Health Academy; 11405 87 Avenue; Edmonton, Alberta, Canada; T6G 1C9. Phone: 780 2485435. Email: [ari.joffe@albertahealthservices.ca](mailto:ari.joffe@albertahealthservices.ca) Fax: 780 4073214.

## PICU Delirium Searches

---

Topic: Delirium (all causes) in PICU (not NICU or neonatal); include adolescents

Databases: MEDLINE, EMBASE, CINAHL, PsycINFO, and HaPI

Limits: 1980-current

Study design/publication type: all (including letters, notes, commentary)

PubMed will be searched for last 180 days.

### Search Summary

| Database      | Results    | Duplicates between databases removed (de-duped) |
|---------------|------------|-------------------------------------------------|
| MEDLINE       | 51         | 51                                              |
| EMBASE        | 63         | 34                                              |
| PsycINFO      | 40         | 40                                              |
| HaPI          | 0          | 0                                               |
| CINAHL        | 3          | 2                                               |
| PubMed        | 55         | 8                                               |
| <b>TOTALS</b> | <b>212</b> | <b>135</b>                                      |

### Notes for all searches:

- Limits: date range: 1980-current
- No language or publication type limits – PsycINFO search brought in many book references
- Scoping searches showed limiting to PICU rather than an 18 and under population was too narrow, therefore age (infant [not neonate], child, adolescent) was combined with delirium. Using PICU, references to adolescents were not retrieved.
- With poor indexing in this topic area (diagnostic accuracy), PubMed was run from 1980-current instead of the originally planned last 180 days as a check and balance to the other database retrievals.

### Search Methodology

Comprehensive search strategies were developed by an information specialist (TD) using a combination of subject headings and keywords and adapted for 6 electronic bibliographic databases. Searches were conducted in the following electronic databases: MEDLINE (Ovid, 1946 to May Week 1 2013), EMBASE (Ovid, 1980 to 2013 Week 19), PsycINFO (Ovid, 1806 to May Week 1 2013), Health and Psychosocial Instruments HaPI (Ovid, 1985 to April 2013), CINAHL Plus with Full Text (EBSCOhost) (1937 to May 2013), and PubMed. No language or publication type restrictions were applied. References were downloaded into EndNote 4X.0.2 (Thomson Reuters).

### Search Strategies

#### Ovid MEDLINE 1946 to May Week 1 2013

OvidSP version: Version: OvidSP\_UI03.08.01.105, SourceID 57688

Search date: 10.05.2013

Limits: 1980-current

Results: 51 De-duped: 51

PICU delirium1

1. Delirium/
2. deliri\$.tw.
3. deleri\$.tw.
4. Confusion/
5. (acute adj2 confusion\$.tw.
6. (acute adj2 brain syndrome).tw.
7. (acute adj2 organic psychosyndrome).tw.
8. (acute adj2 psycho-organic syndrome).tw.
9. (acute adj2 brain failure).tw.
10. (terminal\$ adj restless\$.tw.
11. toxic confus\$.tw.
12. or/1-11
13. exp child/
14. infant/
15. (child or children or infant? or baby or babies).tw.
16. Adolescent/
17. adolescen\$.tw.
18. young adult?.tw.
19. teen\$.tw.
20. youth?.tw.
21. or/13-20
22. Psychological tests/
23. exp Neuropsychological Tests/
24. neuropsychologic\$ test?.tw.
25. ((screen\$ or evaluat\$ or assess\$ or diagnos\$ or rating or rate or measur\$ or case finding) adj5 (index or test\$ or instrument\$ or inventor\$ or battery or batteries or tool? or scale? or checklist? or check list? or schedule?)).tw.
26. (Paediatric Confusion Assessment Method or Pediatric Confusion Assessment Method or pCAM-ICU).tw.
27. (Cornell Assessment of Pediatric Delirium or CAP-D).tw.
28. (Pediatric Anesthesia Emergence Delirium or PAED).tw.
29. (Delirium Rating Scale or DRS-88).tw.
30. (Delirium Rating Scale-Revised or DRS-R-98 or Delirium Rating Scale-Revised Version-1998).tw.
31. (Delirium Diagnostic Tool-Provisional or DDT-Pro).tw.
32. Inferential Confusion Scale.tw.
33. (Nursing Delirium Screening Scale or Nu-DESC).tw.
34. Confusion Assessment Method.tw.
35. Cognitive Test for Delirium.tw.
36. or/22-35
37. exp "Sensitivity and Specificity"/
38. sensitivity.tw.
39. specificity.tw.
40. ((pre-test or pretest) adj probability).tw.
41. post-test probability.tw.
42. likelihood ratio\$.tw.
43. (reliability or reproducib\$ or inter rate or interrater or valid\$ or test retest or predictive or psychometric\$.mp.
44. or/37-43
45. and/12,21,36,44
46. limit 45 to yr="1980 -Current"

47. remove duplicates from 46

**EMBASE 1980 to 2013 Week 19**

OvidSP version: Version: OvidSP\_UI03.08.01.105, SourceID 57688

Search date: 10.05.2013

Limits: 1980-current

Results: 63 De-duped: 34

PICU delirium2

1. Delirium/
2. Postoperative delirium/
3. deliri\$.tw.
4. deleri\$.tw.
5. exp Confusion/
6. (acute adj2 confusion\$).tw.
7. (acute adj2 brain syndrome).tw.
8. (acute adj2 organic psychosyndrome).tw.
9. (acute adj2 psycho-organic syndrome).tw.
10. (acute adj2 brain failure).tw.
11. (terminal\$ adj restless\$).tw.
12. toxic confus\$.tw.
13. or/1-12
14. exp child/
15. (child or children or infant? or baby or babies).tw.
16. exp adolescent/
17. adolescen\$.tw.
18. young adult?.tw.
19. teen\$.tw.
20. youth?.tw.
21. or/14-20
22. exp psychologic test/
23. neurologic examination/
24. neuropsychological test/
25. neuropsychologic\$ test?.tw.
26. ((screen\$ or evaluat\$ or assess\$ or diagnos\$ or rating or rate or measur\$ or case finding) adj5 (index or test\$ or instrument\$ or inventor\$ or battery or batteries or tool? or scale? or checklist? or check list? or schedule?)).tw.
27. (Paediatric Confusion Assessment Method or Pediatric Confusion Assessment Method or pCAM-ICU).tw.
28. (Cornell Assessment of Pediatric Delirium or CAP-D).tw.
29. (Pediatric Anesthesia Emergence Delirium or PAED).tw.
30. (Delirium Rating Scale or DRS-88).tw.
31. (Delirium Rating Scale-Revised or DRS-R-98 or Delirium Rating Scale-Revised Version-1998).tw.
32. (Delirium Diagnostic Tool-Provisional or DDT-Pro).tw.
33. Inferential Confusion Scale.tw.
34. (Nursing Delirium Screening Scale or Nu-DESC).tw.
35. Confusion Assessment Method.tw.
36. Cognitive Test for Delirium.tw.
37. or/22-36
38. exp "Sensitivity and Specificity"/

39. sensitivity.tw.
40. specificity.tw.
41. ((pre-test or pretest) adj probability).tw.
42. post-test probability.tw.
43. likelihood ratio\$.tw.
44. \*Diagnostic Accuracy/
45. (reliability or reproducib\$ or inter rate or interrater or valid\$ or test retest or predictive or psychometric\$).mp.
46. or/38-45
47. and/13,21,37,46
48. limit 47 to yr="1980 -Current"
49. limit 48 to exclude medline journals
50. 48 not 49
51. remove duplicates from 50

### **PsycINFO 1806 to May Week 1 2013**

OvidSP version: Version: OvidSP\_UI03.08.01.105, SourceID 57688

Search date: 10.05.2013

Limits: 1980-current

Results: 40 De-duped: 40

Note: no diagnostic evaluation filter used. Use of filter gave 3 results removing documents that may have relevance.

PICU delirium3

1. Delirium/
2. deliri\$.tw.
3. deleri\$.tw.
4. (acute adj2 confusion\$).tw.
5. (acute adj2 brain syndrome).tw.
6. (acute adj2 organic psychosyndrome).tw.
7. (acute adj2 psycho-organic syndrome).tw.
8. (acute adj2 brain failure).tw.
9. (terminal\$ adj restless\$).tw.
10. toxic confus\$.tw.
11. or/1-10
12. (child or children or infant? or baby or babies).tw.
13. adolescen\$.tw.
14. young adult?.tw.
15. teen\$.tw.
16. youth?.tw.
17. or/12-16
18. psychological assessment/
19. exp neuropsychological assessment/
20. cognitive assessment/
21. neuropsychologic\$ test?.tw.
22. ((screen\$ or evaluat\$ or assess\$ or diagnos\$ or rating or rate or measur\$ or case finding) adj5 (index or test\$ or instrument\$ or inventor\$ or battery or batteries or tool? or scale? or checklist? or check list? or schedule?)).tw.
23. (Paediatric Confusion Assessment Method or Pediatric Confusion Assessment Method or pCAM-ICU).tw.

24. (Cornell Assessment of Pediatric Delirium or CAP-D).tw.
25. (Pediatric Anesthesia Emergence Delirium or PAED).tw.
26. (Delirium Rating Scale or DRS-88).tw.
27. (Delirium Rating Scale-Revised or DRS-R-98 or Delirium Rating Scale-Revised Version-1998).tw.
28. (Delirium Diagnostic Tool-Provisional or DDT-Pro).tw.
29. Inferential Confusion Scale.tw.
30. (Nursing Delirium Screening Scale or Nu-DESC).tw.
31. Confusion Assessment Method.tw.
32. Cognitive Test for Delirium.tw.
33. or/18-32
34. and/11,17,33
35. limit 34 to yr="1980 -Current"
36. remove duplicates from 35

### Health and Psychosocial Instruments (HaPI) 1985 to April 2013

OvidSP version: Version: OvidSP\_UI03.08.01.105, SourceID 57688

Search date: 10.05.2013

Limits: 1980-current

Results: 0 De-duped: 0

Note: this is a database of tests; used to find additional tests

### PICU delirium4

1. deliri\$.mp.
2. deleri\$.tw.
3. (acute adj2 confusion\$).tw.
4. (acute adj2 brain syndrome).tw.
5. (acute adj2 organic psychosyndrome).tw.
6. (acute adj2 psycho-organic syndrome).tw.
7. (acute adj2 brain failure).tw.
8. (terminal\$ adj restless\$).tw.
9. toxic confus\$.tw.
10. or/1-9
11. (child or children or infant? or baby or babies).tw.
12. adolescen\$.tw.
13. young adult?.tw.
14. teen\$.tw.
15. youth?.tw.
16. or/11-15
17. psychological test?.tw.
18. neuropsychologic\$ test?.tw.
19. ((screen\$ or evaluat\$ or assess\$ or diagnos\$ or rating or rate or measur\$ or case finding) adj5 (index or test\$ or instrument\$ or inventor\$ or battery or batteries or tool? or scale? or checklist? or check list? or schedule?)).tw.
20. (Paediatric Confusion Assessment Method or Pediatric Confusion Assessment Method or pCAM-ICU).tw.
21. (Cornell Assessment of Pediatric Delirium or CAP-D).tw.
22. (Pediatric Anesthesia Emergence Delirium or PAED).tw.
23. (Delirium Rating Scale or DRS-88).tw.
24. (Delirium Rating Scale-Revised or DRS-R-98 or Delirium Rating Scale-Revised Version-1998).tw.
25. (Delirium Diagnostic Tool-Provisional or DDT-Pro).tw.
26. Inferential Confusion Scale.tw.

27. (Nursing Delirium Screening Scale or Nu-DESC).tw.
28. Confusion Assessment Method.tw.
29. Cognitive Test for Delirium.tw.
30. or/17-29
31. and/10, 16, 30
32. limit 32 to yr="1980 -Current"

**CINAHL Plus with Full Text**

Interface: EBSCOhost, advanced search

Searched: 10.05.2013

Limits: 1980-current

Results: 3 De-duped: 2

| #   | Query                                                                                                                                                                                                                                                                                                                                                                                                                                                                                                                                                       | Limiters/Expanders                                                                                          | Results |
|-----|-------------------------------------------------------------------------------------------------------------------------------------------------------------------------------------------------------------------------------------------------------------------------------------------------------------------------------------------------------------------------------------------------------------------------------------------------------------------------------------------------------------------------------------------------------------|-------------------------------------------------------------------------------------------------------------|---------|
| S18 | S5 AND S8 AND S13 AND S17                                                                                                                                                                                                                                                                                                                                                                                                                                                                                                                                   | Limiters - Published Date from: 19800101-20131231; Exclude MEDLINE records<br>Search modes - Boolean/Phrase | 3       |
| S17 | S14 OR S15 OR S16                                                                                                                                                                                                                                                                                                                                                                                                                                                                                                                                           | Search modes - Boolean/Phrase                                                                               | 230,219 |
| S16 | (MH "Instrument Validation")                                                                                                                                                                                                                                                                                                                                                                                                                                                                                                                                | Search modes - Boolean/Phrase                                                                               | 19,202  |
| S15 | ( sensitivity or specificity ) OR ( pre-test w1 probability or pretest w1 probability or post-test w1 probability or likelihood w1 ratio ) OR ( reliability or reproducib* or inter rate or interrater or valid* or test retest or predictive or psychometric* )                                                                                                                                                                                                                                                                                            | Search modes - Boolean/Phrase                                                                               | 230,219 |
| S14 | (MH "Sensitivity and Specificity")                                                                                                                                                                                                                                                                                                                                                                                                                                                                                                                          | Search modes - Boolean/Phrase                                                                               | 40,385  |
| S13 | S9 OR S10 OR S11 OR S12                                                                                                                                                                                                                                                                                                                                                                                                                                                                                                                                     | Search modes - Boolean/Phrase                                                                               | 150,046 |
| S12 | ( Paediatric Confusion Assessment Method or Pediatric Confusion Assessment Method or pCAM-ICU ) OR ( Cornell Assessment of Pediatric Delirium or CAP- ) OR ( Pediatric Anesthesia Emergence Delirium or PAED ) OR ( Delirium Rating Scale or DRS-88 ) OR ( Delirium Rating Scale-Revised or DRS-R-98 or Delirium Rating Scale-Revised Version-1998 ) OR ( Delirium Diagnostic Tool-Provisional or DDT-Pro ) OR Inferential Confusion Scale OR ( Nursing Delirium Screening Scale or Nu-DESC ) OR Confusion Assessment Method OR Cognitive Test for Delirium | Search modes - Boolean/Phrase                                                                               | 2,206   |
| S11 | ( screen* w5 index or evaluat* w5 index or assess* w5 index or diagnos* w5 index or rating w5 index or rate w5 index or                                                                                                                                                                                                                                                                                                                                                                                                                                     | Search modes - Boolean/Phrase                                                                               | 133,178 |

|     |                                                                                                                                                                                                                                                                                                                                                                                                                                                                                                                                                                                                                                                                                                                                                                                                                                                                                                                                                                                                                                                                                                                                                                                                                                                                                                                                                                                                                                                                                                                                                                                                                                                                                                                                                                                                                                                                                                                                                                                                                                                          |                               |         |
|-----|----------------------------------------------------------------------------------------------------------------------------------------------------------------------------------------------------------------------------------------------------------------------------------------------------------------------------------------------------------------------------------------------------------------------------------------------------------------------------------------------------------------------------------------------------------------------------------------------------------------------------------------------------------------------------------------------------------------------------------------------------------------------------------------------------------------------------------------------------------------------------------------------------------------------------------------------------------------------------------------------------------------------------------------------------------------------------------------------------------------------------------------------------------------------------------------------------------------------------------------------------------------------------------------------------------------------------------------------------------------------------------------------------------------------------------------------------------------------------------------------------------------------------------------------------------------------------------------------------------------------------------------------------------------------------------------------------------------------------------------------------------------------------------------------------------------------------------------------------------------------------------------------------------------------------------------------------------------------------------------------------------------------------------------------------------|-------------------------------|---------|
|     | <p>measur* w5 index or case finding w5 index ) OR ( screen* w5 test* or evaluat* w5 test* or assess* w5 test* or diagnos* w5 test* or rating w5 test* or rate w5 test* or measur* w5 test* or case finding w5 test* ) OR ( screen* w5 instrument* or evaluat* w5 instrument* or assess* w5 instrument* or diagnos* w5 instrument* or rating w5 instrument* or rate w5 instrument* or measur* w5 instrument* or case finding w5 instrument* ) OR ( screen* w5 inventor* or evaluat* w5 inventor* or assess* w5 inventor* or diagnos* w5 inventor* or rating w5 inventor* or rate w5 inventor* or measur* w5 inventor* or case finding w5 inventor* ) OR ( screen* w5 battery or evaluat* w5 battery or assess* w5 battery or diagnos* w5 battery or rating w5 battery or rate w5 battery or measur* w5 battery or case finding w5 battery ) OR ( screen* w5 batteries or evaluat* w5 batteries or assess* w5 batteries or diagnos* w5 batteries or rating w5 batteries or rate w5 batteries or measur* w5 batteries or case finding w5 batteries ) OR ( screen* w5 tool* or evaluat* w5 tool* or assess* w5 tool* or diagnos* w5 tool* or rating w5 tool* or rate w5 tool* or measur* w5 tool* or case finding w5 tool* ) OR ( screen* w5 scale* or evaluat* w5 scale* or assess* w5 scale* or diagnos* w5 scale* or rating w5 scale* or rate w5 scale* or measur* w5 scale* or case finding w5 scale* ) OR ( screen* w5 checklist* or evaluat* w5 checklist* or assess* w5 checklist* or diagnos* w5 checklist* or rating w5 checklist* or rate w5 checklist* or measur* w5 checklist* or case finding w5 checklist* ) OR ( screen* w5 check list* or evaluat* w5 check list* or assess* w5 check list* or diagnos* w5 check list* or rating w5 check list* or rate w5 check list* or measur* w5 check list* or case finding w5 check list* ) OR ( screen* w5 schedule* or evaluat* w5 schedule* or assess* w5 schedule* or diagnos* w5 schedule* or rating w5 schedule* or rate w5 schedule* or measur* w5 schedule* or case finding w5 schedule* )</p> |                               |         |
| S10 | neuropsychologic* test*                                                                                                                                                                                                                                                                                                                                                                                                                                                                                                                                                                                                                                                                                                                                                                                                                                                                                                                                                                                                                                                                                                                                                                                                                                                                                                                                                                                                                                                                                                                                                                                                                                                                                                                                                                                                                                                                                                                                                                                                                                  | Search modes - Boolean/Phrase | 20,451  |
| S9  | (MH "Neuropsychological Tests")                                                                                                                                                                                                                                                                                                                                                                                                                                                                                                                                                                                                                                                                                                                                                                                                                                                                                                                                                                                                                                                                                                                                                                                                                                                                                                                                                                                                                                                                                                                                                                                                                                                                                                                                                                                                                                                                                                                                                                                                                          | Search modes - Boolean/Phrase | 20,013  |
| S8  | S6 OR S7                                                                                                                                                                                                                                                                                                                                                                                                                                                                                                                                                                                                                                                                                                                                                                                                                                                                                                                                                                                                                                                                                                                                                                                                                                                                                                                                                                                                                                                                                                                                                                                                                                                                                                                                                                                                                                                                                                                                                                                                                                                 | Search modes - Boolean/Phrase | 620,409 |
| S7  | child or children or infant? or baby or babies or adolescen* or young adult* or teen* or youth*                                                                                                                                                                                                                                                                                                                                                                                                                                                                                                                                                                                                                                                                                                                                                                                                                                                                                                                                                                                                                                                                                                                                                                                                                                                                                                                                                                                                                                                                                                                                                                                                                                                                                                                                                                                                                                                                                                                                                          | Search modes - Boolean/Phrase | 578,526 |
| S6  | (MH "Child") OR (MH "Infant") OR (MH "Infant, Newborn") OR (MH "Adolescence+")                                                                                                                                                                                                                                                                                                                                                                                                                                                                                                                                                                                                                                                                                                                                                                                                                                                                                                                                                                                                                                                                                                                                                                                                                                                                                                                                                                                                                                                                                                                                                                                                                                                                                                                                                                                                                                                                                                                                                                           | Search modes - Boolean/Phrase | 495,697 |
| S5  | S1 OR S2 OR S3 OR S4                                                                                                                                                                                                                                                                                                                                                                                                                                                                                                                                                                                                                                                                                                                                                                                                                                                                                                                                                                                                                                                                                                                                                                                                                                                                                                                                                                                                                                                                                                                                                                                                                                                                                                                                                                                                                                                                                                                                                                                                                                     | Search modes - Boolean/Phrase | 5,219   |
| S4  | acute w2 confusion* or acute w2 brain syndrome or acute                                                                                                                                                                                                                                                                                                                                                                                                                                                                                                                                                                                                                                                                                                                                                                                                                                                                                                                                                                                                                                                                                                                                                                                                                                                                                                                                                                                                                                                                                                                                                                                                                                                                                                                                                                                                                                                                                                                                                                                                  | Search modes -                | 275     |



|    |                                                                                                                  |                               |       |
|----|------------------------------------------------------------------------------------------------------------------|-------------------------------|-------|
|    | w2 organic psychosyndrome or acute w2 psycho-organic syndrome or acute w2 brain failure or terminal* w restless* | Boolean/Phrase                |       |
| S3 | (MH "Confusion+")                                                                                                | Search modes - Boolean/Phrase | 4,008 |
| S2 | deliri* or deleri*                                                                                               | Search modes - Boolean/Phrase | 3,998 |
| S1 | (MH "Delirium")                                                                                                  | Search modes - Boolean/Phrase | 2,837 |

PubMed <http://www.ncbi.nlm.nih.gov/pubmed/>

Searched: 12.05.2013

Limits: 1980-current

Results: 55 De-duped: 8

| Search              | Add to builder      | Query                                                                                                                                                                                                                                                                                                                                                  | Items found             |
|---------------------|---------------------|--------------------------------------------------------------------------------------------------------------------------------------------------------------------------------------------------------------------------------------------------------------------------------------------------------------------------------------------------------|-------------------------|
| <a href="#">#76</a> | <a href="#">Add</a> | Search (((#47) AND #50) AND #69) AND #73 Filters: Publication date from 1980/01/01 to 2013/12/31                                                                                                                                                                                                                                                       | <a href="#">55</a>      |
| <a href="#">#74</a> | <a href="#">Add</a> | Search (((#47) AND #50) AND #69) AND #73                                                                                                                                                                                                                                                                                                               | <a href="#">56</a>      |
| <a href="#">#73</a> | <a href="#">Add</a> | Search (#71) OR #72                                                                                                                                                                                                                                                                                                                                    | <a href="#">1452032</a> |
| <a href="#">#72</a> | <a href="#">Add</a> | Search sensitivity[tiab] OR specificity[tiab] OR predictive value* OR likelihood ratio* OR pre-test probability[tiab] OR pretest probability[tiab] OR post-test probability[tiab] OR reliability[tiab] OR reproducib*[tiab] OR "inter rate*" [tiab] OR interrater[tiab] OR valid*[tiab] or test retest[tiab] OR predictive[tiab] or psychometric[tiab] | <a href="#">1318015</a> |
| <a href="#">#71</a> | <a href="#">Add</a> | Search "Sensitivity and Specificity"[Mesh]                                                                                                                                                                                                                                                                                                             | <a href="#">378819</a>  |
| <a href="#">#69</a> | <a href="#">Add</a> | Search (((((((((((((#33) OR #52) OR #53) OR #57) OR #58) OR #59) OR #61) OR #62) OR #63) OR #64) OR #65) OR #66) OR #67) OR #68                                                                                                                                                                                                                        | <a href="#">1652686</a> |
| <a href="#">#68</a> | <a href="#">Add</a> | Search "Cognitive Test for Delirium"[tiab]                                                                                                                                                                                                                                                                                                             | <a href="#">0</a>       |
| <a href="#">#67</a> | <a href="#">Add</a> | Search "Confusion Assessment Method"[tiab]                                                                                                                                                                                                                                                                                                             | <a href="#">458</a>     |
| <a href="#">#66</a> | <a href="#">Add</a> | Search "Nursing Delirium Screening Scale"[tiab] OR Nu-DESC[tiab]                                                                                                                                                                                                                                                                                       | <a href="#">16</a>      |
| <a href="#">#65</a> | <a href="#">Add</a> | Search "Inferential Confusion Scale"[tiab]                                                                                                                                                                                                                                                                                                             | <a href="#">0</a>       |
| <a href="#">#64</a> | <a href="#">Add</a> | Search "Delirium Diagnostic Tool-Provisional"[tiab] OR DDT-Pro[tiab]                                                                                                                                                                                                                                                                                   | <a href="#">1</a>       |
| <a href="#">#63</a> | <a href="#">Add</a> | Search "Delirium Rating Scale-Revised"[tiab] OR DRS-R-98 OR "Delirium Rating Scale-Revised Version-1998"[tiab]                                                                                                                                                                                                                                         | <a href="#">61</a>      |
| <a href="#">#62</a> | <a href="#">Add</a> | Search "Delirium Rating Scale[tiab] OR DRS-88[tiab]                                                                                                                                                                                                                                                                                                    | <a href="#">151</a>     |
| <a href="#">#61</a> | <a href="#">Add</a> | Search "Pediatric Anesthesia Emergence Delirium"[tiab] OR PAED[tiab]                                                                                                                                                                                                                                                                                   | <a href="#">71</a>      |
| <a href="#">#59</a> | <a href="#">Add</a> | Search "Cornell Assessment of Pediatric Delirium"[tiab] OR CAP-D[tiab]                                                                                                                                                                                                                                                                                 | <a href="#">12</a>      |
| <a href="#">#58</a> | <a href="#">Add</a> | Search "Paediatric Confusion Assessment Method"[tiab] OR "Pediatric Confusion Assessment Method"[tiab] or pCAM-ICU[tiab]                                                                                                                                                                                                                               | <a href="#">5</a>       |
| <a href="#">#57</a> | <a href="#">Add</a> | Search (#56) AND #55                                                                                                                                                                                                                                                                                                                                   | <a href="#">1589185</a> |
| <a href="#">#55</a> | <a href="#">Add</a> | Search index[tiab] OR test*[tiab] OR instrument*[tiab] OR inventor[tiab]* OR battery[tiab] OR batteries[tiab] OR tool*[tiab] OR scale[tiab]* OR                                                                                                                                                                                                        | <a href="#">2638179</a> |

| Search              | Add to builder      | Query                                                                                                                                                                                                                     | Items found             |
|---------------------|---------------------|---------------------------------------------------------------------------------------------------------------------------------------------------------------------------------------------------------------------------|-------------------------|
|                     |                     | checklist[tiab]* OR check list*[tiab] OR schedule*[tiab]                                                                                                                                                                  |                         |
| <a href="#">#56</a> | <a href="#">Add</a> | Search screen*[tiab] OR evaluat*[tiab] OR assess*[tiab] OR diagnos*[tiab] OR rating[tiab] OR rate[tiab] OR measur*[tiab] OR case finding[tiab]                                                                            | <a href="#">6607953</a> |
| <a href="#">#53</a> | <a href="#">Add</a> | Search neuropsychologic* test*[tw]                                                                                                                                                                                        | <a href="#">23897</a>   |
| <a href="#">#52</a> | <a href="#">Add</a> | Search "Neuropsychological Tests"[Mesh]                                                                                                                                                                                   | <a href="#">62289</a>   |
| <a href="#">#33</a> | <a href="#">Add</a> | Search "Psychological Tests"[Mesh:NoExp]                                                                                                                                                                                  | <a href="#">32660</a>   |
| <a href="#">#50</a> | <a href="#">Add</a> | Search (((#14) OR #18) OR #48) OR #27) OR #49                                                                                                                                                                             | <a href="#">2832991</a> |
| <a href="#">#49</a> | <a href="#">Add</a> | Search adolescen*[tiab] OR young adult*[tiab] OR teen*[tiab] OR youth*[tiab]                                                                                                                                              | <a href="#">238034</a>  |
| <a href="#">#27</a> | <a href="#">Add</a> | Search "Adolescent"[Mesh]                                                                                                                                                                                                 | <a href="#">1514909</a> |
| <a href="#">#48</a> | <a href="#">Add</a> | Search child[tiab] or children[tiab] or infant*[tiab] or baby[tiab] or babies[tiab]                                                                                                                                       | <a href="#">1068978</a> |
| <a href="#">#18</a> | <a href="#">Add</a> | Search "Infant"[Mesh:NoExp]                                                                                                                                                                                               | <a href="#">608401</a>  |
| <a href="#">#14</a> | <a href="#">Add</a> | Search "Child"[Mesh]                                                                                                                                                                                                      | <a href="#">1470006</a> |
| <a href="#">#47</a> | <a href="#">Add</a> | Search (((#8) OR #42) OR #45) OR #46                                                                                                                                                                                      | <a href="#">12844</a>   |
| <a href="#">#46</a> | <a href="#">Add</a> | Search acute confusion*[tiab] OR acute brain syndrome[tiab] OR acute organic psychosyndrome[tiab] OR acute psycho-organic syndrome[tiab] OR acute brain failure[tiab] OR terminal* restless*[tiab] OR toxic confus*[tiab] | <a href="#">109</a>     |
| <a href="#">#45</a> | <a href="#">Add</a> | Search "Confusion"[Mesh:NoExp]                                                                                                                                                                                            | <a href="#">3489</a>    |
| <a href="#">#42</a> | <a href="#">Add</a> | Search deliri*[tiab] OR deleri*[tiab]                                                                                                                                                                                     | <a href="#">8302</a>    |
| <a href="#">#8</a>  | <a href="#">Add</a> | Search delirium[mh]                                                                                                                                                                                                       | <a href="#">5161</a>    |

Search Summary:

| Database     | Date Searched | Number Retrieved | After Duplicate Removal |
|--------------|---------------|------------------|-------------------------|
| PubMed       | 11 June 2014  | 65               | N/A                     |
| <b>Total</b> |               | <b>65</b>        |                         |

Database: PubMed

Search Title: Joffe-Diagnosing-delirium\_UpdateJune2014\_RF

Date Searched: June 11, 2014

Results: 65 [Note: 10 studies with a publication date year of 2013 or 2014]

| Search              | Add to builder      | Query                                                                                                                                                                                                                                                                                                                                                  | Items found             | Time     |
|---------------------|---------------------|--------------------------------------------------------------------------------------------------------------------------------------------------------------------------------------------------------------------------------------------------------------------------------------------------------------------------------------------------------|-------------------------|----------|
| <a href="#">#34</a> | <a href="#">Add</a> | Search #7 AND #13 AND #30 AND #33                                                                                                                                                                                                                                                                                                                      | <a href="#">65</a>      | 12:02:54 |
| <a href="#">#33</a> | <a href="#">Add</a> | Search #31 OR #32                                                                                                                                                                                                                                                                                                                                      | <a href="#">1578431</a> | 11:38:26 |
| <a href="#">#32</a> | <a href="#">Add</a> | Search sensitivity[tiab] OR specificity[tiab] OR predictive value* OR likelihood ratio* OR pre-test probability[tiab] OR pretest probability[tiab] OR post-test probability[tiab] OR reliability[tiab] OR reproducib*[tiab] OR "inter rate*" [tiab] OR interrater[tiab] OR valid*[tiab] or test retest[tiab] OR predictive[tiab] or psychometric[tiab] | <a href="#">1435411</a> | 11:38:05 |
| <a href="#">#31</a> | <a href="#">Add</a> | Search "Sensitivity and Specificity"[Mesh]                                                                                                                                                                                                                                                                                                             | <a href="#">408808</a>  | 11:37:50 |
| <a href="#">#30</a> | <a href="#">Add</a> | Search #14 OR #29 OR #15 OR #18 OR #19 OR #20 OR #21 OR #22 OR #23 OR #24 OR #25 OR #26 OR #27 OR #28                                                                                                                                                                                                                                                  | <a href="#">1948678</a> | 11:37:32 |
| <a href="#">#29</a> | <a href="#">Add</a> | Search "Neuropsychological Tests"[Mesh]                                                                                                                                                                                                                                                                                                                | <a href="#">67541</a>   | 11:33:40 |
| <a href="#">#28</a> | <a href="#">Add</a> | Search "Cognitive Test for Delirium"[tiab]                                                                                                                                                                                                                                                                                                             | <a href="#">0</a>       | 11:31:46 |
| <a href="#">#27</a> | <a href="#">Add</a> | Search "Confusion Assessment Method"[tiab]                                                                                                                                                                                                                                                                                                             | <a href="#">544</a>     | 11:31:39 |
| <a href="#">#26</a> | <a href="#">Add</a> | Search "Nursing Delirium Screening Scale"[tiab] OR Nu-DESC[tiab]                                                                                                                                                                                                                                                                                       | <a href="#">22</a>      | 11:31:25 |
| <a href="#">#25</a> | <a href="#">Add</a> | Search "Inferential Confusion Scale"[tiab]                                                                                                                                                                                                                                                                                                             | <a href="#">0</a>       | 11:31:13 |
| <a href="#">#24</a> | <a href="#">Add</a> | Search "Delirium Diagnostic Tool-Provisional"[tiab] OR DDT-Pro[tiab]                                                                                                                                                                                                                                                                                   | <a href="#">1</a>       | 11:30:59 |
| <a href="#">#23</a> | <a href="#">Add</a> | Search "Delirium Rating Scale-Revised"[tiab] OR DRS-R-98 OR "Delirium Rating Scale-Revised Version-1998"[tiab]                                                                                                                                                                                                                                         | <a href="#">83</a>      | 11:30:45 |
| <a href="#">#22</a> | <a href="#">Add</a> | Search "Delirium Rating Scale"[tiab] OR DRS-88[tiab]                                                                                                                                                                                                                                                                                                   | <a href="#">177</a>     | 11:30:28 |
| <a href="#">#21</a> | <a href="#">Add</a> | Search "Pediatric Anesthesia Emergence Delirium"[tiab] OR PAED[tiab]                                                                                                                                                                                                                                                                                   | <a href="#">85</a>      | 11:29:34 |
| <a href="#">#20</a> | <a href="#">Add</a> | Search "Cornell Assessment of Pediatric Delirium"[tiab] OR CAP-D[tiab]                                                                                                                                                                                                                                                                                 | <a href="#">15</a>      | 11:29:21 |
| <a href="#">#19</a> | <a href="#">Add</a> | Search "Paediatric Confusion Assessment Method"[tiab] OR "Pediatric Confusion Assessment Method"[tiab] or pCAM-ICU[tiab]                                                                                                                                                                                                                               | <a href="#">5</a>       | 11:29:06 |
| <a href="#">#18</a> | <a href="#">Add</a> | Search #16 AND #17                                                                                                                                                                                                                                                                                                                                     | <a href="#">1883402</a> | 11:28:49 |
| <a href="#">#17</a> | <a href="#">Add</a> | Search index[tiab] OR test*[tiab] OR instrument*[tiab] OR inventor[tiab]* OR battery[tiab] OR batteries[tiab] OR tool*[tiab] OR                                                                                                                                                                                                                        | <a href="#">3139202</a> | 11:27:47 |

| Search | Add to builder      | Query                                                                                                                                                                                                                            | Items found             | Time     |
|--------|---------------------|----------------------------------------------------------------------------------------------------------------------------------------------------------------------------------------------------------------------------------|-------------------------|----------|
|        |                     | <b>scale[tiab]* OR checklist[tiab]* OR check list*[tiab] OR schedule*[tiab]</b>                                                                                                                                                  |                         |          |
| #16    | <a href="#">Add</a> | Search <b>screen*[tiab] OR evaluat*[tiab] OR assess*[tiab] OR diagnos*[tiab] OR rating[tiab] OR rate[tiab] OR measur*[tiab] OR case finding[tiab]</b>                                                                            | <a href="#">7129063</a> | 11:27:27 |
| #15    | <a href="#">Add</a> | Search <b>neuropsychologic* test*[tw]</b>                                                                                                                                                                                        | <a href="#">30637</a>   | 11:26:42 |
| #14    | <a href="#">Add</a> | Search <b>"Psychological Tests"[Mesh:NoExp]</b>                                                                                                                                                                                  | <a href="#">33283</a>   | 11:26:32 |
| #13    | <a href="#">Add</a> | Search <b>#8 OR #9 OR #10 OR #11 OR #12</b>                                                                                                                                                                                      | <a href="#">2967725</a> | 11:26:21 |
| #12    | <a href="#">Add</a> | Search <b>adolescen*[tiab] OR young adult*[tiab] OR teen*[tiab] OR youth*[tiab]</b>                                                                                                                                              | <a href="#">260825</a>  | 11:25:20 |
| #11    | <a href="#">Add</a> | Search <b>"Adolescent"[Mesh]</b>                                                                                                                                                                                                 | <a href="#">1582247</a> | 11:25:11 |
| #10    | <a href="#">Add</a> | Search <b>child[tiab] or children[tiab] or infant*[tiab] or baby[tiab] or babies[tiab]</b>                                                                                                                                       | <a href="#">1133397</a> | 11:24:59 |
| #9     | <a href="#">Add</a> | Search <b>"Infant"[Mesh:NoExp]</b>                                                                                                                                                                                               | <a href="#">628844</a>  | 11:24:49 |
| #8     | <a href="#">Add</a> | Search <b>"Child"[Mesh]</b>                                                                                                                                                                                                      | <a href="#">1522598</a> | 11:24:39 |
| #7     | <a href="#">Add</a> | Search <b>#3 OR #4 OR #5 OR #6</b>                                                                                                                                                                                               | <a href="#">13929</a>   | 11:22:17 |
| #6     | <a href="#">Add</a> | Search <b>acute confusion*[tiab] OR acute brain syndrome[tiab] OR acute organic psychosyndrome[tiab] OR acute psycho-organic syndrome[tiab] OR acute brain failure[tiab] OR terminal* restless*[tiab] OR toxic confus*[tiab]</b> | <a href="#">113</a>     | 11:21:56 |
| #5     | <a href="#">Add</a> | Search <b>"Confusion"[Mesh:NoExp]</b>                                                                                                                                                                                            | <a href="#">3643</a>    | 11:21:39 |
| #4     | <a href="#">Add</a> | Search <b>deliri*[tiab] OR deleri*[tiab]</b>                                                                                                                                                                                     | <a href="#">9185</a>    | 11:21:28 |
| #3     | <a href="#">Add</a> | Search <b>delirium[mh]</b>                                                                                                                                                                                                       | <a href="#">5593</a>    | 11:21:13 |
