# Supplementary material for: Diagnostic accuracy of delirium diagnosis in pediatric intensive care: a systematic review
Source: Springer Nature journal article supplement (doi:10.1186/s13054-014-0489-x), 2014-09-25
Supplement: MOESM2 [file 9779586]

**DIAGNOSTIC ACCURACY OF DELIRIUM DIAGNOSIS IN PEDIATRIC  
INTENSIVE CARE: A SYSTEMATIC REVIEW**

**ESM\_2\_Joffe:**

**The data collection tool used to abstract study data in the systematic review.**

---

**Authors:** Alia Daoud BSc<sup>1</sup>, Jonathan P Duff MD<sup>1,2</sup>, Ari R Joffe MD<sup>1,2</sup>

**Affiliations:** 1. University of Alberta, Faculty of Medicine and Dentistry; 2. University of Alberta, Department of Pediatrics and Stollery Children's Hospital.

**Corresponding Author:** Ari R Joffe MD; 4-546 Edmonton Clinic Health Academy;  
11405 87 Avenue; Edmonton, Alberta, Canada; T6G 1C9. Phone: 780 2485435. Email:  
[ari.joffe@albertahealthservices.ca](mailto:ari.joffe@albertahealthservices.ca) Fax: 780 4073214.

## DATA COLLECTION TOOL

|                                                                  |                                                                                                                                                                                                                                                                                                                                                                                                                                                            |
|------------------------------------------------------------------|------------------------------------------------------------------------------------------------------------------------------------------------------------------------------------------------------------------------------------------------------------------------------------------------------------------------------------------------------------------------------------------------------------------------------------------------------------|
| Title                                                            |                                                                                                                                                                                                                                                                                                                                                                                                                                                            |
| Authors                                                          |                                                                                                                                                                                                                                                                                                                                                                                                                                                            |
| Reference [Journal, Year, Volume: page numbers]                  |                                                                                                                                                                                                                                                                                                                                                                                                                                                            |
| <b><u>METHODOLOGY</u></b>                                        |                                                                                                                                                                                                                                                                                                                                                                                                                                                            |
| Study Research Question                                          |                                                                                                                                                                                                                                                                                                                                                                                                                                                            |
| Study setting                                                    | University hospital<br>Community hospital                                                                                                                                                                                                                                                                                                                                                                                                                  |
| Index Test Used                                                  | Name: _____<br>Description in enough detail to replicate: Y/N<br>Categories (delirium/not delirium thresholds) defined:<br>apriori/post-hoc<br>What was the threshold for delirium: _____<br>Training of raters: Y/N/not stated<br>Number of raters: _____<br>Qualifications of raters: Research physician Staff intensivist<br>Fellow Resident Bedside nurse Research nurse<br>Parent Others: _____<br>Cost per single index test: \$ _____ Not mentioned |
| Study population:<br>Inclusion (Indications for the Index Test)  | Age: _____<br>Diagnoses: _____<br>Co-morbidities: _____                                                                                                                                                                                                                                                                                                                                                                                                    |
| Study population:<br>Exclusions (Indications for the Index Test) | Age: _____<br>Diagnoses: _____<br>Co-morbidities: _____                                                                                                                                                                                                                                                                                                                                                                                                    |
| Date of Study                                                    | Start date: _____<br>End date: _____                                                                                                                                                                                                                                                                                                                                                                                                                       |
| Name/Type of Reference Test Used:                                | Name (eg. DSM criteria): _____<br>Training of raters: Y/N/not stated<br>Qualifications of raters: Psychiatrist Fellow Resident<br>Nurse Other: _____                                                                                                                                                                                                                                                                                                       |
| Recruitment process                                              | All PICU patients Referral for assessment<br>Other:                                                                                                                                                                                                                                                                                                                                                                                                        |
| Patient Sampling Method                                          | Consecutive<br>Non-consecutive (sub-selection): random/non-random<br>Please describe if non-random: _____                                                                                                                                                                                                                                                                                                                                                  |
| Data Collection Process                                          | Prospective/Retrospective                                                                                                                                                                                                                                                                                                                                                                                                                                  |

| <b>RESULTS</b>                                               |                                                                                                                                                                                                                                                                                                                                                                                                                                               |          |
|--------------------------------------------------------------|-----------------------------------------------------------------------------------------------------------------------------------------------------------------------------------------------------------------------------------------------------------------------------------------------------------------------------------------------------------------------------------------------------------------------------------------------|----------|
| Patient Flow:                                                | Flow diagram in paper                                                                                                                                                                                                                                                                                                                                                                                                                         | Y/N      |
|                                                              | Number eligible                                                                                                                                                                                                                                                                                                                                                                                                                               | n= _____ |
|                                                              | Number meeting pre-specified exclusion criteria                                                                                                                                                                                                                                                                                                                                                                                               | n= _____ |
|                                                              | Number enrolled (intention to diagnose)                                                                                                                                                                                                                                                                                                                                                                                                       | n= _____ |
|                                                              | Number of participants excluded from the study after enrollment:                                                                                                                                                                                                                                                                                                                                                                              | n= _____ |
|                                                              | Number of participants in final numbers for outcome (sensitivity/specificity)                                                                                                                                                                                                                                                                                                                                                                 | n= _____ |
| Reason for exclusion from the study after enrollment (and n) | Invalid Inconclusive Result of Index Test:<br>a) Uninterpretable diagnostic feature:<br>-clinical feature hampers interpretation of test Y/N<br>n= _____<br>Describe: _____<br>-Obstructed test (interrupted) Y/N<br>n= _____<br>Describe: _____<br>-Questionable validity (an inadequate test procedure was conducted; not conducted to an acceptable standard) Y/N<br>n= _____<br>Describe: _____<br>b) Missing (not done): Y/N<br>n= _____ |          |
|                                                              | Valid Inconclusive Index Test (neither clearly positive nor negative; intermediate):<br>a) Continuous inconclusive test results (overlap): Y/N<br>n= _____<br>Describe: _____<br>b) Categorical inconclusive test results: Y/N<br>n= _____<br>Describe: _____                                                                                                                                                                                 |          |
|                                                              | Valid Inconclusive Reference Test (neither clearly positive nor negative):<br>a) Continuous inconclusive test results (overlap): Y/N<br>n= _____<br>Describe: _____<br>b) Categorical inconclusive test results: Y/N<br>n= _____<br>Describe: _____                                                                                                                                                                                           |          |
| <b>Enrolled Participant Descriptions</b>                     |                                                                                                                                                                                                                                                                                                                                                                                                                                               |          |

| Ages                                                                |                                                                                                                                                                                                                                                                                                                                                                                                                                                                                                                                                                                                                                                                                                                                                                                                                                                                                                                                                                                                                                                                                                                                                                                                                                                                                                                                                                                                                                                                                                                                                                                                                                                                                                                                                                                                                                                                                 |                    |                 |                    |             |                      |  |  |  |                  |  |  |  |                     |  |  |  |                     |  |  |  |                        |  |  |  |                  |  |  |  |               |  |  |  |                  |  |  |  |        |  |  |  |     |  |  |  |                    |  |  |  |             |  |  |  |       |  |  |  |             |  |  |  |                    |  |  |  |                 |  |  |  |         |  |  |  |                 |  |  |  |       |  |  |  |                  |  |  |  |            |  |  |  |       |  |  |  |      |  |  |  |     |  |  |  |                 |  |  |  |        |  |  |  |
|---------------------------------------------------------------------|---------------------------------------------------------------------------------------------------------------------------------------------------------------------------------------------------------------------------------------------------------------------------------------------------------------------------------------------------------------------------------------------------------------------------------------------------------------------------------------------------------------------------------------------------------------------------------------------------------------------------------------------------------------------------------------------------------------------------------------------------------------------------------------------------------------------------------------------------------------------------------------------------------------------------------------------------------------------------------------------------------------------------------------------------------------------------------------------------------------------------------------------------------------------------------------------------------------------------------------------------------------------------------------------------------------------------------------------------------------------------------------------------------------------------------------------------------------------------------------------------------------------------------------------------------------------------------------------------------------------------------------------------------------------------------------------------------------------------------------------------------------------------------------------------------------------------------------------------------------------------------|--------------------|-----------------|--------------------|-------------|----------------------|--|--|--|------------------|--|--|--|---------------------|--|--|--|---------------------|--|--|--|------------------------|--|--|--|------------------|--|--|--|---------------|--|--|--|------------------|--|--|--|--------|--|--|--|-----|--|--|--|--------------------|--|--|--|-------------|--|--|--|-------|--|--|--|-------------|--|--|--|--------------------|--|--|--|-----------------|--|--|--|---------|--|--|--|-----------------|--|--|--|-------|--|--|--|------------------|--|--|--|------------|--|--|--|-------|--|--|--|------|--|--|--|-----|--|--|--|-----------------|--|--|--|--------|--|--|--|
| Illness(s)/condition(s) of participants enrolled                    | Admission diagnoses (top 4):<br><br>Co-morbidities (top 4):                                                                                                                                                                                                                                                                                                                                                                                                                                                                                                                                                                                                                                                                                                                                                                                                                                                                                                                                                                                                                                                                                                                                                                                                                                                                                                                                                                                                                                                                                                                                                                                                                                                                                                                                                                                                                     |                    |                 |                    |             |                      |  |  |  |                  |  |  |  |                     |  |  |  |                     |  |  |  |                        |  |  |  |                  |  |  |  |               |  |  |  |                  |  |  |  |        |  |  |  |     |  |  |  |                    |  |  |  |             |  |  |  |       |  |  |  |             |  |  |  |                    |  |  |  |                 |  |  |  |         |  |  |  |                 |  |  |  |       |  |  |  |                  |  |  |  |            |  |  |  |       |  |  |  |      |  |  |  |     |  |  |  |                 |  |  |  |        |  |  |  |
| Risk Factors for delirium:                                          | <table border="1"> <thead> <tr> <th data-bbox="548 306 889 338"><b>Factor</b></th> <th data-bbox="889 306 1101 338"><b>Delirium</b></th> <th data-bbox="1101 306 1328 338"><b>No Delirium</b></th> <th data-bbox="1328 306 1466 338"><b>Risk</b></th> </tr> </thead> <tbody> <tr><td>Age</td><td></td><td></td><td></td></tr> <tr><td>Male</td><td></td><td></td><td></td></tr> <tr><td>Severity of illness</td><td></td><td></td><td></td></tr> <tr><td>Diagnostic Category</td><td></td><td></td><td></td></tr> <tr><td>  Sepsis/fever/infection</td><td></td><td></td><td></td></tr> <tr><td>  Cardiac surgical</td><td></td><td></td><td></td></tr> <tr><td>  Neurosurgical</td><td></td><td></td><td></td></tr> <tr><td>  General Surgical</td><td></td><td></td><td></td></tr> <tr><td>  Trauma</td><td></td><td></td><td></td></tr> <tr><td>  TBI</td><td></td><td></td><td></td></tr> <tr><td>  Neurologic Medical</td><td></td><td></td><td></td></tr> <tr><td>  Respiratory</td><td></td><td></td><td></td></tr> <tr><td>  Other</td><td></td><td></td><td></td></tr> <tr><td>Medications</td><td></td><td></td><td></td></tr> <tr><td>  Inotropes/Pressors</td><td></td><td></td><td></td></tr> <tr><td>  Benzodiazepines</td><td></td><td></td><td></td></tr> <tr><td>  Opiates</td><td></td><td></td><td></td></tr> <tr><td>  Dexmedetomidine</td><td></td><td></td><td></td></tr> <tr><td>  Other</td><td></td><td></td><td></td></tr> <tr><td>Other conditions</td><td></td><td></td><td></td></tr> <tr><td>  Ventilated</td><td></td><td></td><td></td></tr> <tr><td>  Shock</td><td></td><td></td><td></td></tr> <tr><td>  ARDS</td><td></td><td></td><td></td></tr> <tr><td>  HBP</td><td></td><td></td><td></td></tr> <tr><td>  Electrolyte abn</td><td></td><td></td><td></td></tr> <tr><td>  Other:</td><td></td><td></td><td></td></tr> </tbody> </table> | <b>Factor</b>      | <b>Delirium</b> | <b>No Delirium</b> | <b>Risk</b> | Age                  |  |  |  | Male             |  |  |  | Severity of illness |  |  |  | Diagnostic Category |  |  |  | Sepsis/fever/infection |  |  |  | Cardiac surgical |  |  |  | Neurosurgical |  |  |  | General Surgical |  |  |  | Trauma |  |  |  | TBI |  |  |  | Neurologic Medical |  |  |  | Respiratory |  |  |  | Other |  |  |  | Medications |  |  |  | Inotropes/Pressors |  |  |  | Benzodiazepines |  |  |  | Opiates |  |  |  | Dexmedetomidine |  |  |  | Other |  |  |  | Other conditions |  |  |  | Ventilated |  |  |  | Shock |  |  |  | ARDS |  |  |  | HBP |  |  |  | Electrolyte abn |  |  |  | Other: |  |  |  |
| <b>Factor</b>                                                       | <b>Delirium</b>                                                                                                                                                                                                                                                                                                                                                                                                                                                                                                                                                                                                                                                                                                                                                                                                                                                                                                                                                                                                                                                                                                                                                                                                                                                                                                                                                                                                                                                                                                                                                                                                                                                                                                                                                                                                                                                                 | <b>No Delirium</b> | <b>Risk</b>     |                    |             |                      |  |  |  |                  |  |  |  |                     |  |  |  |                     |  |  |  |                        |  |  |  |                  |  |  |  |               |  |  |  |                  |  |  |  |        |  |  |  |     |  |  |  |                    |  |  |  |             |  |  |  |       |  |  |  |             |  |  |  |                    |  |  |  |                 |  |  |  |         |  |  |  |                 |  |  |  |       |  |  |  |                  |  |  |  |            |  |  |  |       |  |  |  |      |  |  |  |     |  |  |  |                 |  |  |  |        |  |  |  |
| Age                                                                 |                                                                                                                                                                                                                                                                                                                                                                                                                                                                                                                                                                                                                                                                                                                                                                                                                                                                                                                                                                                                                                                                                                                                                                                                                                                                                                                                                                                                                                                                                                                                                                                                                                                                                                                                                                                                                                                                                 |                    |                 |                    |             |                      |  |  |  |                  |  |  |  |                     |  |  |  |                     |  |  |  |                        |  |  |  |                  |  |  |  |               |  |  |  |                  |  |  |  |        |  |  |  |     |  |  |  |                    |  |  |  |             |  |  |  |       |  |  |  |             |  |  |  |                    |  |  |  |                 |  |  |  |         |  |  |  |                 |  |  |  |       |  |  |  |                  |  |  |  |            |  |  |  |       |  |  |  |      |  |  |  |     |  |  |  |                 |  |  |  |        |  |  |  |
| Male                                                                |                                                                                                                                                                                                                                                                                                                                                                                                                                                                                                                                                                                                                                                                                                                                                                                                                                                                                                                                                                                                                                                                                                                                                                                                                                                                                                                                                                                                                                                                                                                                                                                                                                                                                                                                                                                                                                                                                 |                    |                 |                    |             |                      |  |  |  |                  |  |  |  |                     |  |  |  |                     |  |  |  |                        |  |  |  |                  |  |  |  |               |  |  |  |                  |  |  |  |        |  |  |  |     |  |  |  |                    |  |  |  |             |  |  |  |       |  |  |  |             |  |  |  |                    |  |  |  |                 |  |  |  |         |  |  |  |                 |  |  |  |       |  |  |  |                  |  |  |  |            |  |  |  |       |  |  |  |      |  |  |  |     |  |  |  |                 |  |  |  |        |  |  |  |
| Severity of illness                                                 |                                                                                                                                                                                                                                                                                                                                                                                                                                                                                                                                                                                                                                                                                                                                                                                                                                                                                                                                                                                                                                                                                                                                                                                                                                                                                                                                                                                                                                                                                                                                                                                                                                                                                                                                                                                                                                                                                 |                    |                 |                    |             |                      |  |  |  |                  |  |  |  |                     |  |  |  |                     |  |  |  |                        |  |  |  |                  |  |  |  |               |  |  |  |                  |  |  |  |        |  |  |  |     |  |  |  |                    |  |  |  |             |  |  |  |       |  |  |  |             |  |  |  |                    |  |  |  |                 |  |  |  |         |  |  |  |                 |  |  |  |       |  |  |  |                  |  |  |  |            |  |  |  |       |  |  |  |      |  |  |  |     |  |  |  |                 |  |  |  |        |  |  |  |
| Diagnostic Category                                                 |                                                                                                                                                                                                                                                                                                                                                                                                                                                                                                                                                                                                                                                                                                                                                                                                                                                                                                                                                                                                                                                                                                                                                                                                                                                                                                                                                                                                                                                                                                                                                                                                                                                                                                                                                                                                                                                                                 |                    |                 |                    |             |                      |  |  |  |                  |  |  |  |                     |  |  |  |                     |  |  |  |                        |  |  |  |                  |  |  |  |               |  |  |  |                  |  |  |  |        |  |  |  |     |  |  |  |                    |  |  |  |             |  |  |  |       |  |  |  |             |  |  |  |                    |  |  |  |                 |  |  |  |         |  |  |  |                 |  |  |  |       |  |  |  |                  |  |  |  |            |  |  |  |       |  |  |  |      |  |  |  |     |  |  |  |                 |  |  |  |        |  |  |  |
| Sepsis/fever/infection                                              |                                                                                                                                                                                                                                                                                                                                                                                                                                                                                                                                                                                                                                                                                                                                                                                                                                                                                                                                                                                                                                                                                                                                                                                                                                                                                                                                                                                                                                                                                                                                                                                                                                                                                                                                                                                                                                                                                 |                    |                 |                    |             |                      |  |  |  |                  |  |  |  |                     |  |  |  |                     |  |  |  |                        |  |  |  |                  |  |  |  |               |  |  |  |                  |  |  |  |        |  |  |  |     |  |  |  |                    |  |  |  |             |  |  |  |       |  |  |  |             |  |  |  |                    |  |  |  |                 |  |  |  |         |  |  |  |                 |  |  |  |       |  |  |  |                  |  |  |  |            |  |  |  |       |  |  |  |      |  |  |  |     |  |  |  |                 |  |  |  |        |  |  |  |
| Cardiac surgical                                                    |                                                                                                                                                                                                                                                                                                                                                                                                                                                                                                                                                                                                                                                                                                                                                                                                                                                                                                                                                                                                                                                                                                                                                                                                                                                                                                                                                                                                                                                                                                                                                                                                                                                                                                                                                                                                                                                                                 |                    |                 |                    |             |                      |  |  |  |                  |  |  |  |                     |  |  |  |                     |  |  |  |                        |  |  |  |                  |  |  |  |               |  |  |  |                  |  |  |  |        |  |  |  |     |  |  |  |                    |  |  |  |             |  |  |  |       |  |  |  |             |  |  |  |                    |  |  |  |                 |  |  |  |         |  |  |  |                 |  |  |  |       |  |  |  |                  |  |  |  |            |  |  |  |       |  |  |  |      |  |  |  |     |  |  |  |                 |  |  |  |        |  |  |  |
| Neurosurgical                                                       |                                                                                                                                                                                                                                                                                                                                                                                                                                                                                                                                                                                                                                                                                                                                                                                                                                                                                                                                                                                                                                                                                                                                                                                                                                                                                                                                                                                                                                                                                                                                                                                                                                                                                                                                                                                                                                                                                 |                    |                 |                    |             |                      |  |  |  |                  |  |  |  |                     |  |  |  |                     |  |  |  |                        |  |  |  |                  |  |  |  |               |  |  |  |                  |  |  |  |        |  |  |  |     |  |  |  |                    |  |  |  |             |  |  |  |       |  |  |  |             |  |  |  |                    |  |  |  |                 |  |  |  |         |  |  |  |                 |  |  |  |       |  |  |  |                  |  |  |  |            |  |  |  |       |  |  |  |      |  |  |  |     |  |  |  |                 |  |  |  |        |  |  |  |
| General Surgical                                                    |                                                                                                                                                                                                                                                                                                                                                                                                                                                                                                                                                                                                                                                                                                                                                                                                                                                                                                                                                                                                                                                                                                                                                                                                                                                                                                                                                                                                                                                                                                                                                                                                                                                                                                                                                                                                                                                                                 |                    |                 |                    |             |                      |  |  |  |                  |  |  |  |                     |  |  |  |                     |  |  |  |                        |  |  |  |                  |  |  |  |               |  |  |  |                  |  |  |  |        |  |  |  |     |  |  |  |                    |  |  |  |             |  |  |  |       |  |  |  |             |  |  |  |                    |  |  |  |                 |  |  |  |         |  |  |  |                 |  |  |  |       |  |  |  |                  |  |  |  |            |  |  |  |       |  |  |  |      |  |  |  |     |  |  |  |                 |  |  |  |        |  |  |  |
| Trauma                                                              |                                                                                                                                                                                                                                                                                                                                                                                                                                                                                                                                                                                                                                                                                                                                                                                                                                                                                                                                                                                                                                                                                                                                                                                                                                                                                                                                                                                                                                                                                                                                                                                                                                                                                                                                                                                                                                                                                 |                    |                 |                    |             |                      |  |  |  |                  |  |  |  |                     |  |  |  |                     |  |  |  |                        |  |  |  |                  |  |  |  |               |  |  |  |                  |  |  |  |        |  |  |  |     |  |  |  |                    |  |  |  |             |  |  |  |       |  |  |  |             |  |  |  |                    |  |  |  |                 |  |  |  |         |  |  |  |                 |  |  |  |       |  |  |  |                  |  |  |  |            |  |  |  |       |  |  |  |      |  |  |  |     |  |  |  |                 |  |  |  |        |  |  |  |
| TBI                                                                 |                                                                                                                                                                                                                                                                                                                                                                                                                                                                                                                                                                                                                                                                                                                                                                                                                                                                                                                                                                                                                                                                                                                                                                                                                                                                                                                                                                                                                                                                                                                                                                                                                                                                                                                                                                                                                                                                                 |                    |                 |                    |             |                      |  |  |  |                  |  |  |  |                     |  |  |  |                     |  |  |  |                        |  |  |  |                  |  |  |  |               |  |  |  |                  |  |  |  |        |  |  |  |     |  |  |  |                    |  |  |  |             |  |  |  |       |  |  |  |             |  |  |  |                    |  |  |  |                 |  |  |  |         |  |  |  |                 |  |  |  |       |  |  |  |                  |  |  |  |            |  |  |  |       |  |  |  |      |  |  |  |     |  |  |  |                 |  |  |  |        |  |  |  |
| Neurologic Medical                                                  |                                                                                                                                                                                                                                                                                                                                                                                                                                                                                                                                                                                                                                                                                                                                                                                                                                                                                                                                                                                                                                                                                                                                                                                                                                                                                                                                                                                                                                                                                                                                                                                                                                                                                                                                                                                                                                                                                 |                    |                 |                    |             |                      |  |  |  |                  |  |  |  |                     |  |  |  |                     |  |  |  |                        |  |  |  |                  |  |  |  |               |  |  |  |                  |  |  |  |        |  |  |  |     |  |  |  |                    |  |  |  |             |  |  |  |       |  |  |  |             |  |  |  |                    |  |  |  |                 |  |  |  |         |  |  |  |                 |  |  |  |       |  |  |  |                  |  |  |  |            |  |  |  |       |  |  |  |      |  |  |  |     |  |  |  |                 |  |  |  |        |  |  |  |
| Respiratory                                                         |                                                                                                                                                                                                                                                                                                                                                                                                                                                                                                                                                                                                                                                                                                                                                                                                                                                                                                                                                                                                                                                                                                                                                                                                                                                                                                                                                                                                                                                                                                                                                                                                                                                                                                                                                                                                                                                                                 |                    |                 |                    |             |                      |  |  |  |                  |  |  |  |                     |  |  |  |                     |  |  |  |                        |  |  |  |                  |  |  |  |               |  |  |  |                  |  |  |  |        |  |  |  |     |  |  |  |                    |  |  |  |             |  |  |  |       |  |  |  |             |  |  |  |                    |  |  |  |                 |  |  |  |         |  |  |  |                 |  |  |  |       |  |  |  |                  |  |  |  |            |  |  |  |       |  |  |  |      |  |  |  |     |  |  |  |                 |  |  |  |        |  |  |  |
| Other                                                               |                                                                                                                                                                                                                                                                                                                                                                                                                                                                                                                                                                                                                                                                                                                                                                                                                                                                                                                                                                                                                                                                                                                                                                                                                                                                                                                                                                                                                                                                                                                                                                                                                                                                                                                                                                                                                                                                                 |                    |                 |                    |             |                      |  |  |  |                  |  |  |  |                     |  |  |  |                     |  |  |  |                        |  |  |  |                  |  |  |  |               |  |  |  |                  |  |  |  |        |  |  |  |     |  |  |  |                    |  |  |  |             |  |  |  |       |  |  |  |             |  |  |  |                    |  |  |  |                 |  |  |  |         |  |  |  |                 |  |  |  |       |  |  |  |                  |  |  |  |            |  |  |  |       |  |  |  |      |  |  |  |     |  |  |  |                 |  |  |  |        |  |  |  |
| Medications                                                         |                                                                                                                                                                                                                                                                                                                                                                                                                                                                                                                                                                                                                                                                                                                                                                                                                                                                                                                                                                                                                                                                                                                                                                                                                                                                                                                                                                                                                                                                                                                                                                                                                                                                                                                                                                                                                                                                                 |                    |                 |                    |             |                      |  |  |  |                  |  |  |  |                     |  |  |  |                     |  |  |  |                        |  |  |  |                  |  |  |  |               |  |  |  |                  |  |  |  |        |  |  |  |     |  |  |  |                    |  |  |  |             |  |  |  |       |  |  |  |             |  |  |  |                    |  |  |  |                 |  |  |  |         |  |  |  |                 |  |  |  |       |  |  |  |                  |  |  |  |            |  |  |  |       |  |  |  |      |  |  |  |     |  |  |  |                 |  |  |  |        |  |  |  |
| Inotropes/Pressors                                                  |                                                                                                                                                                                                                                                                                                                                                                                                                                                                                                                                                                                                                                                                                                                                                                                                                                                                                                                                                                                                                                                                                                                                                                                                                                                                                                                                                                                                                                                                                                                                                                                                                                                                                                                                                                                                                                                                                 |                    |                 |                    |             |                      |  |  |  |                  |  |  |  |                     |  |  |  |                     |  |  |  |                        |  |  |  |                  |  |  |  |               |  |  |  |                  |  |  |  |        |  |  |  |     |  |  |  |                    |  |  |  |             |  |  |  |       |  |  |  |             |  |  |  |                    |  |  |  |                 |  |  |  |         |  |  |  |                 |  |  |  |       |  |  |  |                  |  |  |  |            |  |  |  |       |  |  |  |      |  |  |  |     |  |  |  |                 |  |  |  |        |  |  |  |
| Benzodiazepines                                                     |                                                                                                                                                                                                                                                                                                                                                                                                                                                                                                                                                                                                                                                                                                                                                                                                                                                                                                                                                                                                                                                                                                                                                                                                                                                                                                                                                                                                                                                                                                                                                                                                                                                                                                                                                                                                                                                                                 |                    |                 |                    |             |                      |  |  |  |                  |  |  |  |                     |  |  |  |                     |  |  |  |                        |  |  |  |                  |  |  |  |               |  |  |  |                  |  |  |  |        |  |  |  |     |  |  |  |                    |  |  |  |             |  |  |  |       |  |  |  |             |  |  |  |                    |  |  |  |                 |  |  |  |         |  |  |  |                 |  |  |  |       |  |  |  |                  |  |  |  |            |  |  |  |       |  |  |  |      |  |  |  |     |  |  |  |                 |  |  |  |        |  |  |  |
| Opiates                                                             |                                                                                                                                                                                                                                                                                                                                                                                                                                                                                                                                                                                                                                                                                                                                                                                                                                                                                                                                                                                                                                                                                                                                                                                                                                                                                                                                                                                                                                                                                                                                                                                                                                                                                                                                                                                                                                                                                 |                    |                 |                    |             |                      |  |  |  |                  |  |  |  |                     |  |  |  |                     |  |  |  |                        |  |  |  |                  |  |  |  |               |  |  |  |                  |  |  |  |        |  |  |  |     |  |  |  |                    |  |  |  |             |  |  |  |       |  |  |  |             |  |  |  |                    |  |  |  |                 |  |  |  |         |  |  |  |                 |  |  |  |       |  |  |  |                  |  |  |  |            |  |  |  |       |  |  |  |      |  |  |  |     |  |  |  |                 |  |  |  |        |  |  |  |
| Dexmedetomidine                                                     |                                                                                                                                                                                                                                                                                                                                                                                                                                                                                                                                                                                                                                                                                                                                                                                                                                                                                                                                                                                                                                                                                                                                                                                                                                                                                                                                                                                                                                                                                                                                                                                                                                                                                                                                                                                                                                                                                 |                    |                 |                    |             |                      |  |  |  |                  |  |  |  |                     |  |  |  |                     |  |  |  |                        |  |  |  |                  |  |  |  |               |  |  |  |                  |  |  |  |        |  |  |  |     |  |  |  |                    |  |  |  |             |  |  |  |       |  |  |  |             |  |  |  |                    |  |  |  |                 |  |  |  |         |  |  |  |                 |  |  |  |       |  |  |  |                  |  |  |  |            |  |  |  |       |  |  |  |      |  |  |  |     |  |  |  |                 |  |  |  |        |  |  |  |
| Other                                                               |                                                                                                                                                                                                                                                                                                                                                                                                                                                                                                                                                                                                                                                                                                                                                                                                                                                                                                                                                                                                                                                                                                                                                                                                                                                                                                                                                                                                                                                                                                                                                                                                                                                                                                                                                                                                                                                                                 |                    |                 |                    |             |                      |  |  |  |                  |  |  |  |                     |  |  |  |                     |  |  |  |                        |  |  |  |                  |  |  |  |               |  |  |  |                  |  |  |  |        |  |  |  |     |  |  |  |                    |  |  |  |             |  |  |  |       |  |  |  |             |  |  |  |                    |  |  |  |                 |  |  |  |         |  |  |  |                 |  |  |  |       |  |  |  |                  |  |  |  |            |  |  |  |       |  |  |  |      |  |  |  |     |  |  |  |                 |  |  |  |        |  |  |  |
| Other conditions                                                    |                                                                                                                                                                                                                                                                                                                                                                                                                                                                                                                                                                                                                                                                                                                                                                                                                                                                                                                                                                                                                                                                                                                                                                                                                                                                                                                                                                                                                                                                                                                                                                                                                                                                                                                                                                                                                                                                                 |                    |                 |                    |             |                      |  |  |  |                  |  |  |  |                     |  |  |  |                     |  |  |  |                        |  |  |  |                  |  |  |  |               |  |  |  |                  |  |  |  |        |  |  |  |     |  |  |  |                    |  |  |  |             |  |  |  |       |  |  |  |             |  |  |  |                    |  |  |  |                 |  |  |  |         |  |  |  |                 |  |  |  |       |  |  |  |                  |  |  |  |            |  |  |  |       |  |  |  |      |  |  |  |     |  |  |  |                 |  |  |  |        |  |  |  |
| Ventilated                                                          |                                                                                                                                                                                                                                                                                                                                                                                                                                                                                                                                                                                                                                                                                                                                                                                                                                                                                                                                                                                                                                                                                                                                                                                                                                                                                                                                                                                                                                                                                                                                                                                                                                                                                                                                                                                                                                                                                 |                    |                 |                    |             |                      |  |  |  |                  |  |  |  |                     |  |  |  |                     |  |  |  |                        |  |  |  |                  |  |  |  |               |  |  |  |                  |  |  |  |        |  |  |  |     |  |  |  |                    |  |  |  |             |  |  |  |       |  |  |  |             |  |  |  |                    |  |  |  |                 |  |  |  |         |  |  |  |                 |  |  |  |       |  |  |  |                  |  |  |  |            |  |  |  |       |  |  |  |      |  |  |  |     |  |  |  |                 |  |  |  |        |  |  |  |
| Shock                                                               |                                                                                                                                                                                                                                                                                                                                                                                                                                                                                                                                                                                                                                                                                                                                                                                                                                                                                                                                                                                                                                                                                                                                                                                                                                                                                                                                                                                                                                                                                                                                                                                                                                                                                                                                                                                                                                                                                 |                    |                 |                    |             |                      |  |  |  |                  |  |  |  |                     |  |  |  |                     |  |  |  |                        |  |  |  |                  |  |  |  |               |  |  |  |                  |  |  |  |        |  |  |  |     |  |  |  |                    |  |  |  |             |  |  |  |       |  |  |  |             |  |  |  |                    |  |  |  |                 |  |  |  |         |  |  |  |                 |  |  |  |       |  |  |  |                  |  |  |  |            |  |  |  |       |  |  |  |      |  |  |  |     |  |  |  |                 |  |  |  |        |  |  |  |
| ARDS                                                                |                                                                                                                                                                                                                                                                                                                                                                                                                                                                                                                                                                                                                                                                                                                                                                                                                                                                                                                                                                                                                                                                                                                                                                                                                                                                                                                                                                                                                                                                                                                                                                                                                                                                                                                                                                                                                                                                                 |                    |                 |                    |             |                      |  |  |  |                  |  |  |  |                     |  |  |  |                     |  |  |  |                        |  |  |  |                  |  |  |  |               |  |  |  |                  |  |  |  |        |  |  |  |     |  |  |  |                    |  |  |  |             |  |  |  |       |  |  |  |             |  |  |  |                    |  |  |  |                 |  |  |  |         |  |  |  |                 |  |  |  |       |  |  |  |                  |  |  |  |            |  |  |  |       |  |  |  |      |  |  |  |     |  |  |  |                 |  |  |  |        |  |  |  |
| HBP                                                                 |                                                                                                                                                                                                                                                                                                                                                                                                                                                                                                                                                                                                                                                                                                                                                                                                                                                                                                                                                                                                                                                                                                                                                                                                                                                                                                                                                                                                                                                                                                                                                                                                                                                                                                                                                                                                                                                                                 |                    |                 |                    |             |                      |  |  |  |                  |  |  |  |                     |  |  |  |                     |  |  |  |                        |  |  |  |                  |  |  |  |               |  |  |  |                  |  |  |  |        |  |  |  |     |  |  |  |                    |  |  |  |             |  |  |  |       |  |  |  |             |  |  |  |                    |  |  |  |                 |  |  |  |         |  |  |  |                 |  |  |  |       |  |  |  |                  |  |  |  |            |  |  |  |       |  |  |  |      |  |  |  |     |  |  |  |                 |  |  |  |        |  |  |  |
| Electrolyte abn                                                     |                                                                                                                                                                                                                                                                                                                                                                                                                                                                                                                                                                                                                                                                                                                                                                                                                                                                                                                                                                                                                                                                                                                                                                                                                                                                                                                                                                                                                                                                                                                                                                                                                                                                                                                                                                                                                                                                                 |                    |                 |                    |             |                      |  |  |  |                  |  |  |  |                     |  |  |  |                     |  |  |  |                        |  |  |  |                  |  |  |  |               |  |  |  |                  |  |  |  |        |  |  |  |     |  |  |  |                    |  |  |  |             |  |  |  |       |  |  |  |             |  |  |  |                    |  |  |  |                 |  |  |  |         |  |  |  |                 |  |  |  |       |  |  |  |                  |  |  |  |            |  |  |  |       |  |  |  |      |  |  |  |     |  |  |  |                 |  |  |  |        |  |  |  |
| Other:                                                              |                                                                                                                                                                                                                                                                                                                                                                                                                                                                                                                                                                                                                                                                                                                                                                                                                                                                                                                                                                                                                                                                                                                                                                                                                                                                                                                                                                                                                                                                                                                                                                                                                                                                                                                                                                                                                                                                                 |                    |                 |                    |             |                      |  |  |  |                  |  |  |  |                     |  |  |  |                     |  |  |  |                        |  |  |  |                  |  |  |  |               |  |  |  |                  |  |  |  |        |  |  |  |     |  |  |  |                    |  |  |  |             |  |  |  |       |  |  |  |             |  |  |  |                    |  |  |  |                 |  |  |  |         |  |  |  |                 |  |  |  |       |  |  |  |                  |  |  |  |            |  |  |  |       |  |  |  |      |  |  |  |     |  |  |  |                 |  |  |  |        |  |  |  |
| Predisposing (pre-existing) co-morbidities of participants enrolled | <table border="1"> <thead> <tr> <th data-bbox="548 1356 889 1388"><b>Factor</b></th> <th data-bbox="889 1356 1101 1388"><b>Delirium</b></th> <th data-bbox="1101 1356 1328 1388"><b>No Delirium</b></th> <th data-bbox="1328 1356 1466 1388"><b>Risk</b></th> </tr> </thead> <tbody> <tr><td>Cognitive impairment</td><td></td><td></td><td></td></tr> <tr><td>Seizure disorder</td><td></td><td></td><td></td></tr> <tr><td>Stroke</td><td></td><td></td><td></td></tr> <tr><td>Vision impaired</td><td></td><td></td><td></td></tr> <tr><td>Hearing impaired</td><td></td><td></td><td></td></tr> <tr><td>Other</td><td></td><td></td><td></td></tr> </tbody> </table>                                                                                                                                                                                                                                                                                                                                                                                                                                                                                                                                                                                                                                                                                                                                                                                                                                                                                                                                                                                                                                                                                                                                                                                                        | <b>Factor</b>      | <b>Delirium</b> | <b>No Delirium</b> | <b>Risk</b> | Cognitive impairment |  |  |  | Seizure disorder |  |  |  | Stroke              |  |  |  | Vision impaired     |  |  |  | Hearing impaired       |  |  |  | Other            |  |  |  |               |  |  |  |                  |  |  |  |        |  |  |  |     |  |  |  |                    |  |  |  |             |  |  |  |       |  |  |  |             |  |  |  |                    |  |  |  |                 |  |  |  |         |  |  |  |                 |  |  |  |       |  |  |  |                  |  |  |  |            |  |  |  |       |  |  |  |      |  |  |  |     |  |  |  |                 |  |  |  |        |  |  |  |
| <b>Factor</b>                                                       | <b>Delirium</b>                                                                                                                                                                                                                                                                                                                                                                                                                                                                                                                                                                                                                                                                                                                                                                                                                                                                                                                                                                                                                                                                                                                                                                                                                                                                                                                                                                                                                                                                                                                                                                                                                                                                                                                                                                                                                                                                 | <b>No Delirium</b> | <b>Risk</b>     |                    |             |                      |  |  |  |                  |  |  |  |                     |  |  |  |                     |  |  |  |                        |  |  |  |                  |  |  |  |               |  |  |  |                  |  |  |  |        |  |  |  |     |  |  |  |                    |  |  |  |             |  |  |  |       |  |  |  |             |  |  |  |                    |  |  |  |                 |  |  |  |         |  |  |  |                 |  |  |  |       |  |  |  |                  |  |  |  |            |  |  |  |       |  |  |  |      |  |  |  |     |  |  |  |                 |  |  |  |        |  |  |  |
| Cognitive impairment                                                |                                                                                                                                                                                                                                                                                                                                                                                                                                                                                                                                                                                                                                                                                                                                                                                                                                                                                                                                                                                                                                                                                                                                                                                                                                                                                                                                                                                                                                                                                                                                                                                                                                                                                                                                                                                                                                                                                 |                    |                 |                    |             |                      |  |  |  |                  |  |  |  |                     |  |  |  |                     |  |  |  |                        |  |  |  |                  |  |  |  |               |  |  |  |                  |  |  |  |        |  |  |  |     |  |  |  |                    |  |  |  |             |  |  |  |       |  |  |  |             |  |  |  |                    |  |  |  |                 |  |  |  |         |  |  |  |                 |  |  |  |       |  |  |  |                  |  |  |  |            |  |  |  |       |  |  |  |      |  |  |  |     |  |  |  |                 |  |  |  |        |  |  |  |
| Seizure disorder                                                    |                                                                                                                                                                                                                                                                                                                                                                                                                                                                                                                                                                                                                                                                                                                                                                                                                                                                                                                                                                                                                                                                                                                                                                                                                                                                                                                                                                                                                                                                                                                                                                                                                                                                                                                                                                                                                                                                                 |                    |                 |                    |             |                      |  |  |  |                  |  |  |  |                     |  |  |  |                     |  |  |  |                        |  |  |  |                  |  |  |  |               |  |  |  |                  |  |  |  |        |  |  |  |     |  |  |  |                    |  |  |  |             |  |  |  |       |  |  |  |             |  |  |  |                    |  |  |  |                 |  |  |  |         |  |  |  |                 |  |  |  |       |  |  |  |                  |  |  |  |            |  |  |  |       |  |  |  |      |  |  |  |     |  |  |  |                 |  |  |  |        |  |  |  |
| Stroke                                                              |                                                                                                                                                                                                                                                                                                                                                                                                                                                                                                                                                                                                                                                                                                                                                                                                                                                                                                                                                                                                                                                                                                                                                                                                                                                                                                                                                                                                                                                                                                                                                                                                                                                                                                                                                                                                                                                                                 |                    |                 |                    |             |                      |  |  |  |                  |  |  |  |                     |  |  |  |                     |  |  |  |                        |  |  |  |                  |  |  |  |               |  |  |  |                  |  |  |  |        |  |  |  |     |  |  |  |                    |  |  |  |             |  |  |  |       |  |  |  |             |  |  |  |                    |  |  |  |                 |  |  |  |         |  |  |  |                 |  |  |  |       |  |  |  |                  |  |  |  |            |  |  |  |       |  |  |  |      |  |  |  |     |  |  |  |                 |  |  |  |        |  |  |  |
| Vision impaired                                                     |                                                                                                                                                                                                                                                                                                                                                                                                                                                                                                                                                                                                                                                                                                                                                                                                                                                                                                                                                                                                                                                                                                                                                                                                                                                                                                                                                                                                                                                                                                                                                                                                                                                                                                                                                                                                                                                                                 |                    |                 |                    |             |                      |  |  |  |                  |  |  |  |                     |  |  |  |                     |  |  |  |                        |  |  |  |                  |  |  |  |               |  |  |  |                  |  |  |  |        |  |  |  |     |  |  |  |                    |  |  |  |             |  |  |  |       |  |  |  |             |  |  |  |                    |  |  |  |                 |  |  |  |         |  |  |  |                 |  |  |  |       |  |  |  |                  |  |  |  |            |  |  |  |       |  |  |  |      |  |  |  |     |  |  |  |                 |  |  |  |        |  |  |  |
| Hearing impaired                                                    |                                                                                                                                                                                                                                                                                                                                                                                                                                                                                                                                                                                                                                                                                                                                                                                                                                                                                                                                                                                                                                                                                                                                                                                                                                                                                                                                                                                                                                                                                                                                                                                                                                                                                                                                                                                                                                                                                 |                    |                 |                    |             |                      |  |  |  |                  |  |  |  |                     |  |  |  |                     |  |  |  |                        |  |  |  |                  |  |  |  |               |  |  |  |                  |  |  |  |        |  |  |  |     |  |  |  |                    |  |  |  |             |  |  |  |       |  |  |  |             |  |  |  |                    |  |  |  |                 |  |  |  |         |  |  |  |                 |  |  |  |       |  |  |  |                  |  |  |  |            |  |  |  |       |  |  |  |      |  |  |  |     |  |  |  |                 |  |  |  |        |  |  |  |
| Other                                                               |                                                                                                                                                                                                                                                                                                                                                                                                                                                                                                                                                                                                                                                                                                                                                                                                                                                                                                                                                                                                                                                                                                                                                                                                                                                                                                                                                                                                                                                                                                                                                                                                                                                                                                                                                                                                                                                                                 |                    |                 |                    |             |                      |  |  |  |                  |  |  |  |                     |  |  |  |                     |  |  |  |                        |  |  |  |                  |  |  |  |               |  |  |  |                  |  |  |  |        |  |  |  |     |  |  |  |                    |  |  |  |             |  |  |  |       |  |  |  |             |  |  |  |                    |  |  |  |                 |  |  |  |         |  |  |  |                 |  |  |  |       |  |  |  |                  |  |  |  |            |  |  |  |       |  |  |  |      |  |  |  |     |  |  |  |                 |  |  |  |        |  |  |  |
| The Outcomes of delirium:                                           | <table border="1"> <thead> <tr> <th data-bbox="548 1656 889 1688"><b>Outcome</b></th> <th data-bbox="889 1656 1101 1688"><b>Delirium</b></th> <th data-bbox="1101 1656 1328 1688"><b>No Delirium</b></th> <th data-bbox="1328 1656 1466 1688"><b>Risk</b></th> </tr> </thead> <tbody> <tr><td>Mortality</td><td></td><td></td><td></td></tr> <tr><td>  PICU</td><td></td><td></td><td></td></tr> <tr><td>  Hospital</td><td></td><td></td><td></td></tr> <tr><td>  Other</td><td></td><td></td><td></td></tr> <tr><td>LOS</td><td></td><td></td><td></td></tr> <tr><td>  Ventilation d</td><td></td><td></td><td></td></tr> <tr><td>  PICU d</td><td></td><td></td><td></td></tr> </tbody> </table>                                                                                                                                                                                                                                                                                                                                                                                                                                                                                                                                                                                                                                                                                                                                                                                                                                                                                                                                                                                                                                                                                                                                                                             | <b>Outcome</b>     | <b>Delirium</b> | <b>No Delirium</b> | <b>Risk</b> | Mortality            |  |  |  | PICU             |  |  |  | Hospital            |  |  |  | Other               |  |  |  | LOS                    |  |  |  | Ventilation d    |  |  |  | PICU d        |  |  |  |                  |  |  |  |        |  |  |  |     |  |  |  |                    |  |  |  |             |  |  |  |       |  |  |  |             |  |  |  |                    |  |  |  |                 |  |  |  |         |  |  |  |                 |  |  |  |       |  |  |  |                  |  |  |  |            |  |  |  |       |  |  |  |      |  |  |  |     |  |  |  |                 |  |  |  |        |  |  |  |
| <b>Outcome</b>                                                      | <b>Delirium</b>                                                                                                                                                                                                                                                                                                                                                                                                                                                                                                                                                                                                                                                                                                                                                                                                                                                                                                                                                                                                                                                                                                                                                                                                                                                                                                                                                                                                                                                                                                                                                                                                                                                                                                                                                                                                                                                                 | <b>No Delirium</b> | <b>Risk</b>     |                    |             |                      |  |  |  |                  |  |  |  |                     |  |  |  |                     |  |  |  |                        |  |  |  |                  |  |  |  |               |  |  |  |                  |  |  |  |        |  |  |  |     |  |  |  |                    |  |  |  |             |  |  |  |       |  |  |  |             |  |  |  |                    |  |  |  |                 |  |  |  |         |  |  |  |                 |  |  |  |       |  |  |  |                  |  |  |  |            |  |  |  |       |  |  |  |      |  |  |  |     |  |  |  |                 |  |  |  |        |  |  |  |
| Mortality                                                           |                                                                                                                                                                                                                                                                                                                                                                                                                                                                                                                                                                                                                                                                                                                                                                                                                                                                                                                                                                                                                                                                                                                                                                                                                                                                                                                                                                                                                                                                                                                                                                                                                                                                                                                                                                                                                                                                                 |                    |                 |                    |             |                      |  |  |  |                  |  |  |  |                     |  |  |  |                     |  |  |  |                        |  |  |  |                  |  |  |  |               |  |  |  |                  |  |  |  |        |  |  |  |     |  |  |  |                    |  |  |  |             |  |  |  |       |  |  |  |             |  |  |  |                    |  |  |  |                 |  |  |  |         |  |  |  |                 |  |  |  |       |  |  |  |                  |  |  |  |            |  |  |  |       |  |  |  |      |  |  |  |     |  |  |  |                 |  |  |  |        |  |  |  |
| PICU                                                                |                                                                                                                                                                                                                                                                                                                                                                                                                                                                                                                                                                                                                                                                                                                                                                                                                                                                                                                                                                                                                                                                                                                                                                                                                                                                                                                                                                                                                                                                                                                                                                                                                                                                                                                                                                                                                                                                                 |                    |                 |                    |             |                      |  |  |  |                  |  |  |  |                     |  |  |  |                     |  |  |  |                        |  |  |  |                  |  |  |  |               |  |  |  |                  |  |  |  |        |  |  |  |     |  |  |  |                    |  |  |  |             |  |  |  |       |  |  |  |             |  |  |  |                    |  |  |  |                 |  |  |  |         |  |  |  |                 |  |  |  |       |  |  |  |                  |  |  |  |            |  |  |  |       |  |  |  |      |  |  |  |     |  |  |  |                 |  |  |  |        |  |  |  |
| Hospital                                                            |                                                                                                                                                                                                                                                                                                                                                                                                                                                                                                                                                                                                                                                                                                                                                                                                                                                                                                                                                                                                                                                                                                                                                                                                                                                                                                                                                                                                                                                                                                                                                                                                                                                                                                                                                                                                                                                                                 |                    |                 |                    |             |                      |  |  |  |                  |  |  |  |                     |  |  |  |                     |  |  |  |                        |  |  |  |                  |  |  |  |               |  |  |  |                  |  |  |  |        |  |  |  |     |  |  |  |                    |  |  |  |             |  |  |  |       |  |  |  |             |  |  |  |                    |  |  |  |                 |  |  |  |         |  |  |  |                 |  |  |  |       |  |  |  |                  |  |  |  |            |  |  |  |       |  |  |  |      |  |  |  |     |  |  |  |                 |  |  |  |        |  |  |  |
| Other                                                               |                                                                                                                                                                                                                                                                                                                                                                                                                                                                                                                                                                                                                                                                                                                                                                                                                                                                                                                                                                                                                                                                                                                                                                                                                                                                                                                                                                                                                                                                                                                                                                                                                                                                                                                                                                                                                                                                                 |                    |                 |                    |             |                      |  |  |  |                  |  |  |  |                     |  |  |  |                     |  |  |  |                        |  |  |  |                  |  |  |  |               |  |  |  |                  |  |  |  |        |  |  |  |     |  |  |  |                    |  |  |  |             |  |  |  |       |  |  |  |             |  |  |  |                    |  |  |  |                 |  |  |  |         |  |  |  |                 |  |  |  |       |  |  |  |                  |  |  |  |            |  |  |  |       |  |  |  |      |  |  |  |     |  |  |  |                 |  |  |  |        |  |  |  |
| LOS                                                                 |                                                                                                                                                                                                                                                                                                                                                                                                                                                                                                                                                                                                                                                                                                                                                                                                                                                                                                                                                                                                                                                                                                                                                                                                                                                                                                                                                                                                                                                                                                                                                                                                                                                                                                                                                                                                                                                                                 |                    |                 |                    |             |                      |  |  |  |                  |  |  |  |                     |  |  |  |                     |  |  |  |                        |  |  |  |                  |  |  |  |               |  |  |  |                  |  |  |  |        |  |  |  |     |  |  |  |                    |  |  |  |             |  |  |  |       |  |  |  |             |  |  |  |                    |  |  |  |                 |  |  |  |         |  |  |  |                 |  |  |  |       |  |  |  |                  |  |  |  |            |  |  |  |       |  |  |  |      |  |  |  |     |  |  |  |                 |  |  |  |        |  |  |  |
| Ventilation d                                                       |                                                                                                                                                                                                                                                                                                                                                                                                                                                                                                                                                                                                                                                                                                                                                                                                                                                                                                                                                                                                                                                                                                                                                                                                                                                                                                                                                                                                                                                                                                                                                                                                                                                                                                                                                                                                                                                                                 |                    |                 |                    |             |                      |  |  |  |                  |  |  |  |                     |  |  |  |                     |  |  |  |                        |  |  |  |                  |  |  |  |               |  |  |  |                  |  |  |  |        |  |  |  |     |  |  |  |                    |  |  |  |             |  |  |  |       |  |  |  |             |  |  |  |                    |  |  |  |                 |  |  |  |         |  |  |  |                 |  |  |  |       |  |  |  |                  |  |  |  |            |  |  |  |       |  |  |  |      |  |  |  |     |  |  |  |                 |  |  |  |        |  |  |  |
| PICU d                                                              |                                                                                                                                                                                                                                                                                                                                                                                                                                                                                                                                                                                                                                                                                                                                                                                                                                                                                                                                                                                                                                                                                                                                                                                                                                                                                                                                                                                                                                                                                                                                                                                                                                                                                                                                                                                                                                                                                 |                    |                 |                    |             |                      |  |  |  |                  |  |  |  |                     |  |  |  |                     |  |  |  |                        |  |  |  |                  |  |  |  |               |  |  |  |                  |  |  |  |        |  |  |  |     |  |  |  |                    |  |  |  |             |  |  |  |       |  |  |  |             |  |  |  |                    |  |  |  |                 |  |  |  |         |  |  |  |                 |  |  |  |       |  |  |  |                  |  |  |  |            |  |  |  |       |  |  |  |      |  |  |  |     |  |  |  |                 |  |  |  |        |  |  |  |

|                                                                                                         | <b>Outcome</b>                                                                                                                                           | <b>Delirium</b>    | <b>No Delirium</b> | <b>Risk</b> |
|---------------------------------------------------------------------------------------------------------|----------------------------------------------------------------------------------------------------------------------------------------------------------|--------------------|--------------------|-------------|
|                                                                                                         | Hospital d<br>Neurocognitive<br>PTSD<br>Other                                                                                                            |                    |                    |             |
| Treatment of delirium described                                                                         | Benzodiazepines:<br>Dexmedetomidine:<br>Haloperidol:<br>Atypical Antipsychotic:<br>Other:                                                                |                    |                    |             |
| The Incidence of any delirium (%)<br>(#patients with delirium diagnosis by reference test)/ (#patients) | (#pts with delirium by reference test)/(#pts enrolled in the study)= _____<br>(#pts with delirium by reference test)/(#pts included in the study)= _____ |                    |                    |             |
| The Incidence of hyperactive delirium (%)                                                               | (#pts with delirium by reference test)/(#pts enrolled in the study)= _____<br>(#pts with delirium by reference test)/(#pts included in the study)= _____ |                    |                    |             |
| The Incidence of hypoactive delirium (%)                                                                | (#pts with delirium by reference test)/(#pts enrolled in the study)= _____<br>(#pts with delirium by reference test)/(#pts included in the study)= _____ |                    |                    |             |
| The Incidence of mixed delirium (%)                                                                     | (#pts with delirium by reference test)/(#pts enrolled in the study)= _____<br>(#pts with delirium by reference test)/(#pts included in the study)= _____ |                    |                    |             |
| Time Interval between repeated measurements                                                             | Of Index Test (Hours):                                                                                                                                   | Intra-rater: _____ | Inter-rater: _____ |             |
|                                                                                                         | Of Reference Test (Hours):                                                                                                                               | Intra-rater: _____ | Inter-rater: _____ |             |
| Time Interval between the Index and Reference Test                                                      | < 12hr    12 to 24 hours    >24 hours<br>Was there any treatment for delirium in between: Y/N                                                            |                    |                    |             |
| <b><u>The presence of Types of BIAS</u></b>                                                             |                                                                                                                                                          |                    |                    |             |
| Spectrum Bias                                                                                           | Included patients do not represent the intended spectrum of severity for the target condition or alternative conditions (eg more advanced stages).       | YES                | NO                 | Describe:   |
| Selection Bias                                                                                          | Eligible patients are not enrolled consecutively or randomly                                                                                             | YES                | NO                 | Describe:   |
| Index Test Information Bias                                                                             | The index test results are interpreted with knowledge of the reference test results, or with more clinical information than in practice.                 | YES                | NO                 | Describe:   |
| Misclassification Bias                                                                                  | The reference standard does not correctly classify patients with the target condition.                                                                   | YES                | NO                 | Describe:   |

|                                                                                                                                                                                                                                                                                                                                                                                                                                                                                                                                                                                                                                                                                                                                                                                                                                                                         |                                                                                                                                                                                                                           |                     |
|-------------------------------------------------------------------------------------------------------------------------------------------------------------------------------------------------------------------------------------------------------------------------------------------------------------------------------------------------------------------------------------------------------------------------------------------------------------------------------------------------------------------------------------------------------------------------------------------------------------------------------------------------------------------------------------------------------------------------------------------------------------------------------------------------------------------------------------------------------------------------|---------------------------------------------------------------------------------------------------------------------------------------------------------------------------------------------------------------------------|---------------------|
| Context Bias                                                                                                                                                                                                                                                                                                                                                                                                                                                                                                                                                                                                                                                                                                                                                                                                                                                            | The prevalence of delirium is much different than expected in the PICU population                                                                                                                                         | YES NO<br>Describe: |
| Partial Verification Bias                                                                                                                                                                                                                                                                                                                                                                                                                                                                                                                                                                                                                                                                                                                                                                                                                                               | A non random set of patients does not undergo the reference standard.                                                                                                                                                     | YES NO<br>Describe: |
| Differential Verification Bias                                                                                                                                                                                                                                                                                                                                                                                                                                                                                                                                                                                                                                                                                                                                                                                                                                          | A set of patients is verified with a different reference standard than another set, especially when this selection depends on the index test result (eg. index test influences decision to order reference test)          | YES NO<br>Describe: |
| Incorporation Bias                                                                                                                                                                                                                                                                                                                                                                                                                                                                                                                                                                                                                                                                                                                                                                                                                                                      | The index test is incorporated in a composite reference standard                                                                                                                                                          | YES NO<br>Describe: |
| Disease Progression Bias                                                                                                                                                                                                                                                                                                                                                                                                                                                                                                                                                                                                                                                                                                                                                                                                                                                | The patients' condition changes between administering the index test and the reference standard (i.e. when the period of time between the index and reference tests is too long; defined as >24hr apart, not on same day) | YES NO<br>Describe: |
| Reference Test Information Bias                                                                                                                                                                                                                                                                                                                                                                                                                                                                                                                                                                                                                                                                                                                                                                                                                                         | The reference standard is interpreted knowing the index test results.                                                                                                                                                     | YES NO<br>Describe: |
| Excluded Data                                                                                                                                                                                                                                                                                                                                                                                                                                                                                                                                                                                                                                                                                                                                                                                                                                                           | Occurs when uninterpretable or intermediate test results and withdrawals are not included in the analysis.                                                                                                                | YES NO<br>Describe: |
| Limited Challenge Bias                                                                                                                                                                                                                                                                                                                                                                                                                                                                                                                                                                                                                                                                                                                                                                                                                                                  | Patients with a specific condition known to adversely affect the way the index test works are excluded (eg. difficult to diagnose patients excluded).                                                                     | YES NO<br>Describe: |
| <p><b>Statistics:</b> count each patient only once i.e. if 1 patient examined more than once, use first exam(iner) only, or report separate for each exam(iner) if available. If only median (IQR) (range) reported among examiners, then cannot create the cross-tabulation table, but can report the reported statistics by median (IQR) (range).</p> <p><b>Fill the next page out for</b></p> <ul style="list-style-type: none"> <li>a) each index test used (if more than one was used in the study), and</li> <li>b) each subgroup reported separately (eg. Individual raters; type of delirium [hyperactive, hypoactive, mixed]; type of participant (eg. Sepsis, Trauma, etc); center (if multicenter study)</li> <li>c) any sensitivity analysis reported (eg. Including valid inconclusive results considered with positive or negative index test)</li> </ul> |                                                                                                                                                                                                                           |                     |

This table and results are for: overall study / subgroup [describe: \_\_\_\_\_]/ sensitivity analysis [describe: \_\_\_\_\_].

| INDEX TEST<br>(Name: _____) | REFERENCE TEST                    |                |                | Totals |
|-----------------------------|-----------------------------------|----------------|----------------|--------|
|                             |                                   | + for Delirium | - for Delirium |        |
|                             | + for Delirium                    | a=             | b=             |        |
|                             | - for Delirium                    | c=             | d=             |        |
|                             | Inconclusive<br>(Uninterpretable) |                |                |        |
|                             | Totals                            |                |                | e      |

|                                                                                                                                                  |                                                                                                     |
|--------------------------------------------------------------------------------------------------------------------------------------------------|-----------------------------------------------------------------------------------------------------|
| Was this cross-tabulation reported in the paper?                                                                                                 | Yes No                                                                                              |
| Sensitivity (The proportion of patients with positive results on the reference test that are also positive on the index test)= $a/(a+c)$         | Mentioned in paper: _____<br>95% CI in paper: _____ or no<br>Calculated from cross tabulation: ____ |
| Specificity (The proportion of patients with negative results on the reference test that are also negative on the index test) = $d/(b+d)$        | Mentioned in paper: _____<br>95% CI in paper: _____ or no<br>Calculated from cross tabulation: ____ |
| Positive Predictive Value = $a/(a+b)$                                                                                                            | Mentioned in paper: _____<br>95% CI in paper: _____ or no<br>Calculated from cross tabulation: ____ |
| Negative Predictive Value = $d/(c+d)$                                                                                                            | Mentioned in paper: _____<br>95% CI in paper: _____ or no<br>Calculated from cross tabulation: ____ |
| Positive Likelihood ratio = sensitivity / (1 - specificity). If a cell is 0, use 0.5 added to each cell in table to calculate LR.                | Mentioned in paper: _____<br>95% CI in paper: _____ or no<br>Calculated from cross tabulation: ____ |
| Negative Likelihood ratio = (1 - sensitivity) / specificity. If a cell is 0, use 0.5 added to each cell in table to calculate LR.                | Mentioned in paper: _____<br>95% CI in paper: _____ or no<br>Calculated from cross tabulation: ____ |
| If there are valid inconclusive results: what was the index test yield = % of patients included in the sensitivity and specificity calculations. | _____%                                                                                              |
| If there are valid inconclusive results: what was the index test effectiveness = correct classification/total tests done = $(a+d)/e$ .           | _____%                                                                                              |
| If there are valid inconclusive results: what was the sensitivity and specificity if the results are grouped with positive index test results.   | Sensitivity: _____<br>Specificity: _____                                                            |
| If there are valid inconclusive results: what was the sensitivity and specificity if the results are grouped with negative index test results.   | Sensitivity: _____<br>Specificity: _____                                                            |

## QUADAS-2 Quality Criteria

### **Patient Selection [3 signaling question, 1 risk of bias question, 1 applicability question]**

|                                                                                 |      |     |         |
|---------------------------------------------------------------------------------|------|-----|---------|
| Was a consecutive or random sample of patients enrolled?                        | YES  | NO  | UNCLEAR |
| Was a case-control design avoided?                                              | YES  | NO  | UNCLEAR |
| Did the study avoid inappropriate exclusions?                                   | YES  | NO  | UNCLEAR |
| Could the selection of patients have introduced bias?                           | High | Low | UNCLEAR |
| Are there concerns that the included patients do not match the review question? | High | Low | UNCLEAR |

### **Index Test [2 signaling question, 1 risk of bias question, 1 applicability question]**

|                                                                                                         |      |     |         |
|---------------------------------------------------------------------------------------------------------|------|-----|---------|
| Were the index test results interpreted without knowledge of the results of the reference standard?     | YES  | NO  | UNCLEAR |
| If a threshold was used, was it pre-specified?                                                          | YES  | NO  | UNCLEAR |
| Could the conduct or interpretation of the index test have introduced bias?                             | High | Low | UNCLEAR |
| Are there concerns that the index test, its conduct, or interpretation differ from the review question? | High | Low | UNCLEAR |

### **Reference Standard [2 signaling question, 1 risk of bias, 1 applicability]**

|                                                                                                                       |      |     |         |
|-----------------------------------------------------------------------------------------------------------------------|------|-----|---------|
| Is the reference standard likely to correctly classify the target condition?                                          | YES  | NO  | UNCLEAR |
| Were the reference standard results interpreted without knowledge of the results of the index test?                   | YES  | NO  | UNCLEAR |
| Could the reference standard, its conduct, or its interpretation have introduced bias?                                | High | Low | UNCLEAR |
| Are there concerns that the target condition as defined by the reference standard does not match the review question? | High | Low | UNCLEAR |

### **Flow and Timing [4 signaling questions, 1 risk of bias]**

|                                                                                 |      |     |         |
|---------------------------------------------------------------------------------|------|-----|---------|
| Was there an appropriate interval between index test(s) and reference standard? | YES  | NO  | UNCLEAR |
| Did all patients receive a reference standard?                                  | YES  | NO  | UNCLEAR |
| Did all patients receive the same reference standard?                           | YES  | NO  | UNCLEAR |
| Were all patients included in the analysis?                                     | YES  | NO  | UNCLEAR |
| Could the patient have introduced bias?                                         | High | Low | UNCLEAR |

#### Note:

1. Applicability ratings “do not include signaling questions. Review authors record the information on which the judgment of applicability is made and then rate their concern that the study does not match the review question. Concerns about applicability are rated as “low”, “high”, or “unclear.” “ The “unclear” category should be used only when insufficient data are reported.”
2. Applicability in patient selection category can refer to concerns about: severity of illness, demographic characteristics, differential diagnoses, co-morbidities, setting of study, or previous testing.



3. If applicability concerns rated high or unclear, please describe reasons here:

Patient selection:

\_\_\_\_\_

Index Test:

\_\_\_\_\_

Reference Standard:

\_\_\_\_\_

Reliability (of index test to differentiate patients with from those without delirium) = observer variability.

Inter-rater:

Number of raters: \_\_\_\_\_

Number of replicate observations: \_\_\_\_\_

Method: intraclass correlation / Kappa statistic / other (\_\_\_\_\_)

Result: \_\_\_\_\_ 95% CI \_\_\_\_\_

Intra-rater:

Number of replicate observations: \_\_\_\_\_

Method: intraclass correlation / Kappa statistic / other (\_\_\_\_\_)

Result: \_\_\_\_\_ 95% CI \_\_\_\_\_

Neither

Agreement (proportion of index test scores that are identical within or between raters)

Inter-rater:

Proportion of Agreement:

95% CI:

Other statistic: \_\_\_\_\_

Intra-rater:

Proportion of agreement:

95% CI:

Other statistic: \_\_\_\_\_

Neither

Name: \_\_\_\_\_

Comments:
